1 Variation in neotropical river otter (*Lontra longicaudis*) diet: Effects of an invasive prey  
2 species

3

4 Effects of invasive prey on Neotropical river otter diet

5

6 Diego Juarez Sanchez<sup>1\*</sup>, John G. Blake<sup>1¶</sup>, Eric C. Hellgren<sup>1¶</sup>

7

8 <sup>1</sup>Department of Wildlife Ecology and Conservation, University of Florida, Gainesville,  
9 Florida United States of America.

10

11 \* Corresponding author

12

13 E-mail: [adjuarez@ufl.edu](mailto:adjuarez@ufl.edu)

14

15 ¶ These authors contributed equally to this work.

16

17

18

19

20

21

22

23

24

25

26

27

28

29

30

31

32

33

34

35

36

37

38

39

40

41

42

43

44

## 45 **Abstract**

46 Due to human activities, some species have expanded their distribution into areas  
47 that were historically difficult or impossible to reach by natural dispersal. Such species  
48 may become invasive if they successfully establish reproductive populations. Predation is  
49 one of the main barriers that exotic species may face in newly colonized areas. We  
50 evaluated the effect of an invasive prey (armored catfish: *Pterygoplichtys* sp.) on the  
51 dietary niche breadth and trophic level of a native predator (Neotropical river otter:  
52 *Lontra longicaudis*) in northern Guatemala. We examined otter scats from three rivers:  
53 two where the invasive armored catfish occurred and one without the invasive fish.  
54 Samples were collected two and seven years after the first report of the catfish in the  
55 area. We performed gross scat analysis and stable isotope analyses of nitrogen and carbon  
56 of fecal matter. Where the invasive armored catfish occurred, it was the main prey item  
57 for *L. longicaudis*. Particularly in the river outside of protected areas seven years after the  
58 first report of the catfish, where it accounted for 49% of the otter diet. Concordance was  
59 found between the two techniques to estimate dietary niche breadth and trophic level.  
60 The dietary niche breath of otters was narrower seven years after the invasion in  
61 comparison to two years after the invasion in both invaded rivers, but, the extent of the  
62 reduction was less inside the protected area. Finally, the trophic level of otters also  
63 showed a reduction related to the occurrence of the armored catfish on their diet.

## 64 **Resumen**

65 Como producto de las actividades humanas algunas especies han expandido su  
66 distribución hacia áreas que históricamente eran difícil o imposible de alcanzar mediante  
67 de dispersión natural. Estas especies pueden convertirse en invasoras si establecen  
68 exitosamente poblaciones reproductivas. La depredación es una de las principales  
69 barreras que las especies exóticas deben afrontar en las áreas recientemente colonizadas.  
70 Evaluamos los efectos de una especie invasora (el pez diablo: *Pterygoplichtys* sp.) sobre la  
71 amplitud de nicho alimenticio y el nivel trófico de un depredador nativo (la nutria de río  
72 Neo-tropical: *Lontra longicaudis*) en el norte de Guatemala. Examinamos las excretas de  
73 nutrias provenientes de tres ríos: dos donde el pez diablo se encuentra presente y uno  
74 donde este invasor aún está ausente. Las muestras fueron colectadas dos y siete años  
75 después del primer reporte de del pez diablo en le área. Realizamos un análisis  
76 macroscópico de las excretas y análisis de isotopos estables de nitrógeno y carbono de la  
77 materia fecal. Donde el pez diablo invasor estaba presente, fue el principal ítem  
78 alimenticio de *L. longicaudis*. Particularmente en el río ubicado fuera de áreas protegidas  
79 siete años después del primer reporte del pez diablo, donde este consistió en el 49% de la  
80 dieta de la nutria. Encontramos concordancia entre las dos técnicas para estimar la  
81 amplitud de nicho dietario y nivel trófico. La amplitud de nicho dietario de las nutrias fue  
82 más angosto siete años después de la invasión en comparación con dos años luego de la  
83 invasión en ambos ríos invadidos, pero la magnitud de la reducción fue inferior dentro del

84 área protegida. Finalmente, observamos una reducción en el nivel trófico de las nutrias  
85 relacionada con la ocurrencia del pez diablo en su dieta.

## 86 Introduction

87 Predators may change their diet after an exotic prey species becomes established  
88 and abundant in the predator's range [1–4]. Inclusion of such a species in a predator's diet  
89 can lead to a shift in the predator's dietary niche, which may become wider or narrower,  
90 depending on the intensity of use of the new resource and changes in the use of  
91 alternative native prey [5]. Furthermore, the type of prey that a predator eats defines its  
92 trophic level (e.g., primary consumer, secondary consumer). Both niche breadth and  
93 trophic levels can be evaluated using gross scat analysis and stable isotopes analyses.

94  
95 An important group of invasive species in freshwater communities are the armored  
96 catfishes of the South American family Loricariidae, a diverse group of fishes with 928  
97 valid species and eight subfamilies, including the genus *Pterygoplichthys*, commonly  
98 known as the suckermouth armored catfish (hereafter ACF; [6]). These catfish are very  
99 popular in the aquarium trade, easily domesticated, exhibit parental care [7], possess  
100 physiological tolerance to adverse conditions [8–12], have wide distribution ranges [13],  
101 and possess high reproductive and growth rates [14,15]. They feed on detritus, an  
102 abundant resource, especially in human-modified areas, and therefore have a low  
103 fractional trophic level (FTL) [13]. These traits contribute to their invasiveness, as they  
104 fulfill the six life-history variables associated with species that successfully establish  
105 invasive populations [16]. The presence of ACF as an invasive species has been  
106 documented for at least 21 countries in five continents [17]. In 2005, an established  
107 population of *Pterygoplichthys pardalis* was found in Laguna Frontera at the mouth of the  
108 Usumacinta River, Tabasco, Mexico [18]. Two years later, *P. pardalis* was reported in  
109 Guatemala in the headwaters of the San Pedro River, a tributary of the Usumacinta River  
110 (Juarez-Sanchez and J. F. Moreira, in prep.). The species identification, however, has not  
111 been confirmed because *P. pardalis* can be misidentified and confused with other species  
112 of *Pterygoplichthys* given that identification is based on ventral color patterns and  
113 hybridization with *P. disjunctivus* has been reported elsewhere [19–21].

114  
115 The ACF has been reported to have positive effects by generating nutrient  
116 hotspots, making nutrients available for producers in nutrient-depleted areas [22].  
117 However, the amount of nutrients released by the ACF does not compensate for its  
118 grazing pressure [23]. Other negative impacts of ACF have been documented in places  
119 where they have established invasive populations. These impacts include asphyxiating  
120 native predators in Puerto Rico [24]; preying on native fish eggs and first-feeding fry in  
121 Thailand [25]; competing for forage with native species, reducing biofilm from the  
122 substrate, and changing the proportions of dissolved nutrients in the Philippines and  
123 Mexico [23,26,27]; harassing manatees [28–30]; and possibly promoting erosion with their  
124 nesting burrows in Florida and Mexico [7,31]. These impacts could occur anywhere ACF  
125 establish an invasive population. Invasive ACF are preyed upon by native piscivorous

126 predators such as common snook (*Centropomus undecimalis*) and the Neotropical  
 127 cormorant (*Phalacrocorax brasilianus*) [32,33], although their effects on these and other  
 128 native predators have not been evaluated.

129

130 Otters (Lutrinae) are mid-sized carnivores that are top predators in freshwater  
 131 wetlands and riverine systems because of their high energetic demand and trophic  
 132 position [34,35]. The Neotropical river otter (*Lontra longicaudis*; hereafter NRO) is a semi-  
 133 aquatic mustelid that preys primarily on benthic slow-moving fish [36], but also feeds on  
 134 crustaceans, mollusks, reptiles, and mammals (Table 1). This species is distributed from  
 135 northern Mexico to northern Argentina, coexisting with different community assemblages  
 136 of prey species, and adapting its foraging behavior according to the local community [37].  
 137 Where ACF are native, they coexist with the NRO and constitute one of the most  
 138 important prey items in its diet [37–40]. However, the role of ACF as a prey item for NRO  
 139 in areas where ACF has been introduced is unknown and may be reshaping the foraging  
 140 ecology of the NRO in those areas.

141

142 **Table 1 Food items reported as present in diets of Neotropical river otters across their geographic range.**

| Locality                   | Primary item                                                                  | Other items                                                                                                                                   | Citation |
|----------------------------|-------------------------------------------------------------------------------|-----------------------------------------------------------------------------------------------------------------------------------------------|----------|
| Oaxaca, México.            | crustaceans (53.0%)                                                           | fish (33.1%), insects (9.8%) and amphibians (4.0%)                                                                                            | [41]     |
| México state, México.      | fish (92.4%)                                                                  | invertebrates (3.5%), amphibians (2.9%) and plant matter (1.8%)                                                                               | [42]     |
| Alto Cauca, Colombia.      | fish (76.7%)                                                                  | insects (12.7%), reptiles (0.7%), and others (9.9%)                                                                                           | [39]     |
| Salta, Argentina.          | fish (53%)                                                                    | insects (24%), crustaceans (16%), amphibians (7%), and reptiles, mammals and mollusks (<0.1%)                                                 | [37]     |
| Rio de Janeiro, Brazil.    | fish (86%)                                                                    | crustaceans (71%), amphibians (10%), mammals (3%), birds (0.6%), reptiles (0.2%) and others (0.7%)                                            | [43]     |
| Rio Grande do Sul, Brazil. | Fish (Loricariidae 41.1%, Cichlidae 21%, Pimelodidae 12.6%, Characidae 6.5 %) | other fish (12.5 %), Megaloptera (3.6%), mammals (1.2%), insects (0.4%), Decapoda (0.1%), birds (0.3%), snakes (0.3%) and plant matter (0.4%) | [38]     |
| Rio Grande do Sul, Brazil. | fish (82.6 %)                                                                 | crustaceans (20.6%), birds (4.5%), mammals and snakes (3.7%), Coleoptera (1.2%), amphibians (0.8%) and mollusks (0.4%)                        | [44]     |
| Rio Grande do Sul, Brazil  | fish                                                                          | mammals, amphibians, birds, snakes, insects, crustaceans mollusks and eggs.                                                                   | [45]     |

143 Percent values are frequency of occurrence and do not add to 100%.

144 The main objective of this study was to determine if invasive armored catfish  
145 affected the diet of Neotropical river otters. Given that NRO feed on ACF in areas where  
146 native populations overlap [38,46,47], we hypothesized that NRO will change their diet to  
147 include ACF in rivers where invasive populations of ACF occur. We predicted that where  
148 ACF are present, they will become the main prey of NRO and reduce the niche breadth of  
149 NRO. If ACF become the main prey of the NRO, we also predicted a lower trophic level for  
150 the NRO in areas where ACF are present due to the low trophic level of the ACF.

## 151 **Materials and methods**

### 152 **Study area**

153 The study area is located at northern Guatemala in the district of Petén (between  
154 15.50° and 17.50° N and -88.50° and -91.25° W) and includes the Usumacinta and Mopan  
155 rivers (Fig. 1). Precipitation ranges from 1,200 to 4,000 mm/year on a gradient decreasing  
156 northward (INSIVUMEH, 2016). Major habitat types in the study area consist of  
157 subtropical moist forest in the north, subtropical very moist forest in the south, and  
158 tropical very moist forest in the southeast [48]. The entire study area consists of lowland  
159 forest, with elevations ranging from 0 to 1000 masl.

160  
161 In northern Guatemala, rivers flow into the Gulf of Mexico or into the Caribbean  
162 Sea watersheds (Fig. 1). Thus, bodies of fresh water are isolated by large expanses of land  
163 in the headwaters, and large distances between river mouths along the coast. The Mopan  
164 River flows northwards from southern Petén and then east in central Belize into the  
165 Caribbean Sea. The Usumacinta River runs northwest into the Gulf of Mexico. Samples  
166 were collected from the Mopan River and two tributaries of the Usumacinta River: The  
167 San Pedro River and the Pasion River. In Guatemala, the San Pedro River flows along the  
168 southern border of Laguna del Tigre National Park whereas the Pasion and the Mopan  
169 rivers mainly run through private lands that are under different land uses.

170  
171 **Fig 1. Study area** for collection of Neotropical river otter scats in northern Guatemala. Grey circles represent  
172 samples collected in 2009-2010; black solid circles represent samples collected in 2015; black hollow circle  
173 represents the area where samples were collected in 2016. The dashed area represents the Usumacinta  
174 basin divided in sub-basins, where the armored catfish has been reported (ACF). The striped area represents  
175 the Caribbean runoff where no ACF has been reported. Grey areas represent protected areas.

176  
177 The Usumacinta basin has at least 61 fish species distributed in 25 families. The  
178 two main families in Usumacinta basin are Cichlidae with 18 species and Poeciliidae with  
179 10 species [6,13,49,50]. To our knowledge, no peer-reviewed document has been  
180 published that describes fishes of the Mopan River within the borders of Guatemala. Thus,  
181 information about the fish assemblage in this river is based on information from the  
182 estuarine area in Belize. Therefore, the number of fish species that we are considering as  
183 present and potential prey for otters in the river headwaters within Guatemalan territory  
184 may be inflated. In Mopan River, there are at least 103 fish species distributed in 32

185 families, including the invasive tilapia (*Oreochromis aureus*). The main families are  
186 Cichlidae with 14 species and Poeciliidae with 16 species [6,13,51]. Exotic tilapia is  
187 widespread across all Guatemala due to multiple introductions, both accidental and  
188 deliberate from aquaculture or governmental fisheries restocking. The Asian grass carp  
189 (*Ctenopharyngodon idella*) and the ACF have been found in the Usumacinta basin, but the  
190 origins of these invasions are not clear.

## 191 **Scat Collection**

192 Samples were collected during three periods: May 2009 – April 2010, May – July  
193 2015, and June 2016. The search for otter scats was conducted from a small boat moving  
194 at slow speeds (< 5 km/h) close to the shoreline, with scats and latrines typically found on  
195 protruding structures (e.g. rocks or fallen trees). This search was conducted along both  
196 shorelines of the river in opposite directions. All scats were collected, placed in paper  
197 and/or plastic bags with silica gel, and stored in a dry environment. Otter scats were  
198 identified by their appearance, as no other species present in the study area have similar  
199 scats (located on protruding sites along the river shore, low fecal matter and high content  
200 of fish or crab remains) [52]. If a scat was found but its identification was doubtful, it was  
201 collected and included in the analysis only if otter hair from grooming was found on it.  
202 Each scat was assigned a unique code and the geographic coordinates of its location were  
203 recorded using a handheld GPS unit (GARMIN © Astro 320, Garmin Ltd. Kansas City, USA).  
204

205 We sampled the Usumacinta basin during 2009-2010 using continuous searches  
206 along the rivers, including 38.5 km of the San Pedro River (starting from Paso Caballos  
207 village and moving west) and 89.1 km of the Pasion River (starting from Sayaxche town  
208 and heading west). We sampled the Usumacinta and Mopan basins in 2015 by organizing  
209 the search for scats into segments of 10 km, with segments separated by at least 10 km. In  
210 the Usumacinta basin, we sampled along 40, 50, and 30 km of the San Pedro, La Pasion,  
211 and Usumacinta rivers, respectively. Surveys began in Paso Caballos for the San Pedro, in  
212 Sayaxche for the Pasion, and in Betel town for the Usumacinta River. The Mopan River  
213 was sampled along 10 km in 2015 near La Polvora military base. In June 2016, local  
214 fisherman collected samples for in the Mopan River near La Polvora military base, no  
215 exact georeference was collected per sample (Fig. 1).

## 216 **Scat Sample Preparation and Analysis**

217 Samples of fecal matter were collected from each scat, homogenized using a  
218 porcelain mortar and pestle, stored in glass vials and sent to the Light Stable Isotope Mass  
219 Spectrometry Laboratory in the Department of Geological Sciences at the University of  
220 Florida for stable isotope analysis (SIA) of  $\delta^{15}\text{N}$  and  $\delta^{13}\text{C}$ . Samples were analyzed using a  
221 Thermo Electron DeltaV Advantage isotope ratio mass spectrometer coupled with a  
222 ConFlo II interface linked to a Carlo Erba NA 1500 CNHS Elemental Analyzer. All carbon  
223 isotopic results are expressed in standard delta notation relative to VPDB. All nitrogen  
224 isotopic results are expressed in standard delta notation relative to AIR. Hard remains (i.e.,

225 scales, skeleton pieces) were separated and identified to the lowest possible taxonomic  
226 level. A list of potential prey species for otters was made, consisting of all the fish species  
227 reported in the study area that have a reported maximum total length  $\geq 100$  mm (S1  
228 Table). Size selection was based on the assumption that otters prefer to feed on fish  
229 within the 100-150 mm size range [53]. Prey remains that could be identified were fish  
230 scales, otoliths or vertebra; crustacean shells; and mammal hairs. A scale guide was  
231 constructed for 68 of the 80 scaled fish species that are found in the sampled river basins  
232 and that were consider potential prey of the NRO [54]. Scales were obtained from  
233 museum specimens at the Florida Museum of Natural History (FLMNH) and El Colegio de  
234 la Frontera Sur in México (ECOSUR). Scales from these fish species were cleaned with  
235 water and alcohol, placed on glass slides with nail polish, and sealed with a coverslip to  
236 make semi-permanent slides. For 10 catfish species that do not have scales, the  
237 identification was based on fin spines, using reference material from the  
238 zooarchaeological collection at FLMNH. Hairs found in the scats were identified using a  
239 hair-identification guide [55] and reference material from the mammal collection of the  
240 Museo de Historia Natural (MUSNAT) at the Universidad de San Carlos de Guatemala  
241 (USAC). Otter hair (product of grooming) was saved and pressed between glass slides and  
242 coverslips for future analysis.

## 243 **Data Analyses**

244 For data analyses, the sampling units were the rivers (San Pedro, La Pasion,  
245 Mopan) with year as factor (2009-2010 and 2015-2016). The year effect represents 2 and  
246 7 years after the advent of the ACF invasion. Comparisons were made over time (i.e.,  
247 same river, different year) only using data from Pasion and San Pedro rivers where the  
248 ACF are present; we additionally looked at differences across river basins in the same  
249 sampling years (i.e., different river, same year), combining 2015-2016 records as one year  
250 and including the Mopan River where ACF do not occur.

251  
252 The importance of each prey species can be biased by abundant and conspicuous  
253 hard remains that are identifiable for some species, even if those species are consumed in  
254 low numbers, due to differential digestibility of prey items. This overestimation of some  
255 species can then lead to an underestimate of overall diet diversity. On the other hand,  
256 when using SIA of predators, one can measure diet diversity breadth and comparative  
257 trophic levels but with no taxonomic information about the prey. For this reason, we used  
258 both techniques, expecting to find concordance between them.

### 259 **Gross scat analysis (GSA)**

260  
261  
262 Accumulation curves were constructed using program EstimateS (© Colwell 2013,  
263 Connecticut, USA) where the expected number of prey species found in a given number of  
264 scats is obtained by

$$265 \tau(h) = S_{obs} - \sum \alpha_{jh} S_j$$

267 
$$\alpha_{jh} = (H-h)!(H-j)!/(H-h-j)!H!$$

268

269 were  $\tau(h)$  is the estimated number of species for  $h$  number of scats;  $S_{obs}$  is the  
270 number of species actually observed;  $S_j$  is the number of prey species found in  $j$  scats;  $\alpha_{jh}$   
271 is a combinatorial coefficient;  $H$  is the total number of scats;  $h$  is the number of possible  
272 combination of scats that add up to  $j$  scats; and  $j$  is the number of scats per moment or  
273 segment of the curve [56].

274

275 The importance of different food items, including the ACF, in the NRO diet was  
276 assessed through GSA, using the percentage of occurrence. Percentage of occurrence was  
277 estimated for a prey item by dividing the number of scats with item  $i$  by the total number  
278 of reported items. To compare the NRO niche breadth between basins, with different prey  
279 communities, Levin's index was used:

280

281 
$$B = 1 / \sum p_i^2$$

282

283 where  $p$  is the proportion of food items from category  $i$  [57]. The Levin's niche-  
284 breadth index can be standardized using:

285

286 
$$B_a = B - 1 / n - 1$$

287

288 where  $B_a$  is the standardized Levin's niche-breadth index,  $B$  is Levin's niche-  
289 breadth index, and  $n$  is the number of recorded species. Levin's index ranges from 1 to  $n$   
290 and from 0 to 1 in its standardized version. In both cases, its minimum value is reached  
291 when all reported prey belongs to only one species (specialist predator) and is at its  
292 maximum when all the species are consumed in the same proportion (generalist  
293 predator). It has been suggested that values of  $B_a > 0.6$  represent a generalist and values  
294 of  $B_a < 0.4$  a specialist [58,59]. To estimate confident intervals the samples (scats) were  
295 randomly selected with replacement (bootstrap), then the index was re-estimated with  
296 the resulting set of samples. This procedure was repeated 1000 times and the confidence  
297 intervals calculated.

298

299 The NRO's fractional trophic level, which represents the trophic distance of a  
300 consumer species from producers, in each basin was estimated using Pauly and  
301 Palomares's (2005) formula:

302

303 
$$FTL_i = 1 + \sum_j (FTL_j DC_{ij})$$

304

305 where  $FTL_i$  is the fractional trophic level of the consumer, +1 is a constant  
306 increment for the FTL of a consumer,  $FTL_j$  is the fractional trophic level of the prey  $j$ , and  
307  $DC_{ij}$  is the proportion of contribution of prey  $j$  to the diet of consumer  $i$ . Prey  $FTL_j$  values  
308 were obtained from FishBase database[13]. The  $DC_{ij}$  was based on proportion of  
309 occurrence values by river-year combination in the otter scats. To estimate confidence  
310 intervals a bootstrap procedure was developed as explained above.



311

## 312 **Stable isotope analysis (SIA)**

313

314 Stable isotope analysis (SIA) measures the proportion of heavy to light stable  
315 isotopes in a sample [63,64]; its values are expressed in delta notation ( $\delta$ ) or per mil (‰)  
316 and estimated with this equation:

317

$$318 \quad \delta = ((R. \text{ sample}/R. \text{ standard}) - 1) \times 1000$$

319

320 where R = heavy isotope / light isotope obtained with a mass spectrometer.

321

322 Isotopic values of a predator are higher than those of its prey due to a process  
323 called fractionation, wherein the molecules with the lighter isotopes, given their lighter  
324 overall weight, react faster and can be metabolized and excreted faster than the heavier  
325 ones. This process results in the predator being enriched with a higher proportion of  
326 heavier isotopes than its prey [61,64]. The mean value of this fractionation across taxa is  
327 3.4‰ (1 SD = 1‰) for  $\delta^{15}\text{N}$  and 0.4‰ (1 SD = 1.3‰) for  $\delta^{13}\text{C}$  [61]. These values are the  
328 expected increment of the isotopic value when molecules are assimilated from prey tissue  
329 to predator tissue (from lower to higher trophic levels;[65]).

330

331 Isotopic values of different tissues, such as bone, blood, hair or muscle, have been  
332 used to evaluate the diets of a wide range of species [66–73]. Normally, tissue samples are  
333 obtained from dead or captured specimens but these invasive techniques are sometimes  
334 difficult or impossible to use, especially for secretive, rare or endangered species.  
335 However, controlled experiments have shown that SIA based on feces is sensitive to  
336 changes in the diet over periods of 3 hours for insectivorous bats [74] and, thus, represent  
337 the isotopic values of the latest meals of the individual that produced the scat[75]. In  
338 carnivores and omnivores, SIA based on scats can be used to estimate the main type of  
339 prey and nutrient flow, using  $\delta^{15}\text{N}$  to infer the range of trophic positions or FTLs at which a  
340 predator eats, and  $\delta^{13}\text{C}$  to determine the type of producers that supported the specific  
341 trophic chain [61,76–78]. Further, the variance of isotopic values of a population may  
342 represent the niche width (or breadth) of a consumer [79].

343

344 Taking  $\delta^{15}\text{N}$  and  $\delta^{13}\text{C}$  values from individual scats as samples from each river, we  
345 evaluated the data for normality using histograms, qq-plots and a Shapiro-Wilk normality  
346 test; all values followed a normal distribution. To evaluate differences between variances  
347 in  $\delta^{13}\text{C}$  and  $\delta^{15}\text{N}$  as a niche breadth metric, a Levene's homoscedasticity test was used. To  
348 test for differences in mean  $\delta^{15}\text{N}$  values between rivers and years we use a two-factor  
349 ANOVA after a log transformation of the data to correct for lack of homoscedasticity; a  
350 post-hoc paired *t*-test with Bonferroni adjusted *p*-values was used to evaluate where the  
351 differences occurred. All the statistical procedures except for the species accumulation  
352 curves were performed using the program R [80].

353

## 354 Results

355 Field collection of scats yielded 286 samples identified as coming from the NRO.  
 356 After eliminating scats that had some type of contamination (e.g., wood, mud, or termite  
 357 nest), 177 samples of fecal matter were sent for isotopic analysis (Table 2). We identified  
 358 35 scaled fish species, including three nonnative fish species (*Oreochromis aureus*,  
 359 *Ctenopharyngodon idella* and *Pterygoplichtys* sp.) from otter scats. In addition, remains of  
 360 unidentified insects, one reptile, one unidentified mammal, and unidentified crabs and  
 361 crayfish were recovered from the scats (Table 3).

362  
 363

**Table 2. Scats of Neotropical river otters collected in northern Guatemala.**

| River      | No. of scats collected (year) | No. of scats without contamination (year) |
|------------|-------------------------------|-------------------------------------------|
| Usumacinta | 1 (2015)                      | 0                                         |
|            | 1 Total                       | 0 Total                                   |
| San Pedro  | 36 (2009)                     | 20 (2009)                                 |
|            | 117 (2015)                    | 55 (2015)                                 |
|            | 153 Total                     | 75 Total                                  |
| La Pasion  | 52 (2010)                     | 36 (2010)                                 |
|            | 40 (2015)                     | 34 (2015)                                 |
|            | 92 Total                      | 70 Total                                  |
| Mopan      | 1 (2015)                      | 1 (2015)                                  |
|            | 39 (2016)                     | 31 (2016)                                 |
|            | 40 Total                      | 32 Total                                  |

364 Only scats without contamination were used for fecal matter isotope analyses

365  
 366  
 367  
 368  
 369

**Table 3. Number of records (No), and percentage of the total of prey species (%) found in otter scats collected from the Mopan, Pasion and San Pedro (San Pe.) rivers, northern Guatemala, during 2009-2010 (09-10) and 2015-2016 (15-16).**

|                              | Mopan 15-16 |     | Pasion 09-10 |   | Pasion 15-16 |   | San Pe. 09-10 |     | San Pe. 15-16 |     |
|------------------------------|-------------|-----|--------------|---|--------------|---|---------------|-----|---------------|-----|
|                              | No          | %   | No           | % | No           | % | No            | %   | No            | %   |
| Belonidae                    |             |     |              |   |              |   |               |     |               |     |
| <i>Strongylura hubbsi</i>    | 0           | 0   | 0            | 0 | 0            | 0 | 3             | 2.2 | 0             | 0   |
| <i>Strongylura marina</i>    | 1           | 1.1 | 0            | 0 | 0            | 0 | 0             | 0   | 0             | 0   |
| Carangidae                   |             |     |              |   |              |   |               |     |               |     |
| <i>Caranx latus</i>          | 1           | 1.1 | 0            | 0 | 0            | 0 | 0             | 0   | 0             | 0   |
| Centropomidae                |             |     |              |   |              |   |               |     |               |     |
| <i>Centropomus ensiferus</i> | 1           | 1.1 | 0            | 0 | 0            | 0 | 0             | 0   | 0             | 0   |
| Characidae                   |             |     |              |   |              |   |               |     |               |     |
| <i>Astianax fasciatus</i>    | 0           | 0   | 0            | 0 | 0            | 0 | 9             | 6.5 | 1             | 0.3 |
| Cichlidae                    |             |     |              |   |              |   |               |     |               |     |
| <i>Chuco intermedius</i>     | 6           | 6.6 | 0            | 0 | 0            | 0 | 0             | 0   | 1             | 0.3 |

|                                        |    |      |    |      |    |      |    |      |    |      |
|----------------------------------------|----|------|----|------|----|------|----|------|----|------|
| <i>Cincolichthys bocourti</i>          | 1  | 1.1  | 0  | 0    | 1  | 1.4  | 0  | 0    | 1  | 0.3  |
| <i>Cincolichthys pearsei</i>           | 0  | 0    | 0  | 0    | 0  | 0    | 0  | 0    | 1  | 0.3  |
| <i>Cribroheros robertsoni</i>          | 1  | 1.1  | 13 | 9.1  | 4  | 5.5  | 22 | 15.8 | 12 | 4.1  |
| <i>Kihmchithys ufermammi</i>           | 0  | 0    | 0  | 0    | 0  | 0    | 3  | 2.2  | 1  | 0.3  |
| <i>Maskaheros argenteus</i>            | 0  | 0    | 1  | 0.7  | 0  | 0    | 0  | 0    | 0  | 0    |
| <i>Mayaheros urophtalmus</i>           | 2  | 2.2  | 5  | 3.5  | 5  | 6.8  | 5  | 3.6  | 17 | 5.9  |
| <i>Oreochromis aureus</i>              | 8  | 8.8  | 5  | 3.5  | 6  | 8.2  | 4  | 2.9  | 21 | 7.3  |
| <i>Parachromis friedrichsthalii</i>    | 2  | 2.2  | 9  | 6.3  | 5  | 6.8  | 1  | 0.7  | 4  | 1.4  |
| <i>Petenia splendida</i>               | 0  | 0    | 1  | 0.7  | 0  | 0    | 0  | 0    | 3  | 1    |
| <i>Rheoheros lentiginosus</i>          | 0  | 0    | 1  | 0.7  | 1  | 1.4  | 0  | 0    | 0  | 0    |
| <i>Rocio octofasciata</i>              | 0  | 0    | 2  | 1.4  | 1  | 1.4  | 0  | 0    | 3  | 1    |
| <i>Thorichthys affinis</i>             | 0  | 0    | 2  | 1.4  | 0  | 0    | 0  | 0    | 1  | 0.3  |
| <i>Thorichthys aureus</i>              | 6  | 6.6  | 0  | 0    | 0  | 0    | 0  | 0    | 0  | 0    |
| <i>Thorichthys meeki</i>               | 5  | 5.5  | 11 | 7.7  | 2  | 2.7  | 10 | 7.2  | 25 | 8.6  |
| <i>Thorichthys pasionis</i>            | 0  | 0    | 10 | 7.0  | 1  | 1.4  | 10 | 7.2  | 8  | 2.8  |
| <i>Trichromis salvini</i>              | 0  | 0    | 0  |      | 0  | 0    | 0  | 0    | 2  | 0.7  |
| <i>Vieja bifasciata</i>                | 0  | 0    | 3  | 2.1  | 6  | 8.2  | 1  | 0.7  | 21 | 7.3  |
| <i>Vieja melanurus</i>                 | 0  | 0    | 3  | 2.1  | 1  | 1.4  | 0  | 0    | 8  | 2.8  |
| Cyprinidae                             |    |      |    |      |    |      |    |      |    |      |
| <i>Ctenopharyngodon idella</i>         | 0  | 0    | 7  | 4.9  | 0  | 0    | 0  | 0    | 5  | 1.7  |
| Eleotridae                             |    |      |    |      |    |      |    |      |    |      |
| <i>Dormitator maculatus</i>            | 1  | 1.1  | 0  | 0    | 0  | 0    | 0  | 0    | 0  | 0    |
| Gerreidae                              |    |      |    |      |    |      |    |      |    |      |
| <i>Eugerres mexicanus</i>              | 0  | 0    | 0  | 0    | 0  | 0    | 0  | 0    | 4  | 1.4  |
| Hemiramphidae                          |    |      |    |      |    |      |    |      |    |      |
| <i>Hyporhamphus mexicanus</i>          | 0  | 0    | 0  | 0    | 0  | 0    | 9  | 6.5  | 2  | 0.7  |
| Lepisosteidae                          |    |      |    |      |    |      |    |      |    |      |
| <i>Aractosteus tropicus</i>            | 0  | 0    | 0  | 0    | 0  | 0    | 1  | 0.7  | 0  | 0    |
| Loricariidae                           |    |      |    |      |    |      |    |      |    |      |
| <i>Pterygoplichthys</i> sp             | 0  | 0    | 14 | 9.9  | 36 | 49.3 | 23 | 16.5 | 75 | 25.9 |
| Megalopidae                            |    |      |    |      |    |      |    |      |    |      |
| <i>Megalops atlanticus</i>             | 0  | 0    | 0  | 0    | 0  | 0    | 0  | 0    | 1  | 0.3  |
| Mugilidae                              |    |      |    |      |    |      |    |      |    |      |
| <i>Mugil cephalus</i>                  | 0  | 0    | 1  | 0.7  | 0  | 0    | 0  | 0    | 0  | 0    |
| Poeciliidae                            |    |      |    |      |    |      |    |      |    |      |
| <i>Belonesox belizanus</i>             | 0  | 0    | 5  | 3.5  | 0  | 0    | 1  | 0.7  | 12 | 4.1  |
| <i>Poecilia mexicana</i>               | 1  | 1.1  | 3  | 2.1  | 1  | 1.4  | 17 | 12.2 | 24 | 8.3  |
| <i>Poecilia petenensis</i>             | 0  | 0    | 11 | 7.7  | 1  | 1.4  | 17 | 12.2 | 26 | 9    |
| Ariidae, Heptapteridae,<br>Ictaluridae |    |      |    |      |    |      |    |      |    |      |
| Catfish                                | 8  | 8.8  | 3  | 2.1  | 1  | 1.4  | 3  | 2.2  | 4  | 1.4  |
| Crab                                   | 32 | 35.2 | 30 | 21.1 | 0  | 0    | 0  | 0    | 3  | 1    |

|                |    |     |     |     |    |      |     |     |     |     |
|----------------|----|-----|-----|-----|----|------|-----|-----|-----|-----|
| Crayfish       | 0  | 0   | 0   | 0   | 0  | 0    | 0   | 0   | 1   | 0.3 |
| Insect         | 3  | 3.3 | 0   | 0   | 0  | 0    | 0   | 0   | 0   | 0   |
| Reptile        | 3  | 3.3 | 0   | 0   | 1  | 1.37 | 0   | 0   | 0   | 0   |
| Unknown        | 8  | 8.8 | 2   | 1.4 | 0  | 0    | 0   | 0   | 2   | 0.7 |
| Unknown mammal | 1  | 1.1 | 0   | 0   | 0  | 0    | 0   | 0   | 0   | 0   |
| Totals         | 44 | 100 | 109 | 100 | 72 | 100  | 138 | 100 | 283 | 100 |

370

371 The precision (one standard deviation of standards) of the  $\delta^{15}\text{N}$  and  $\delta^{13}\text{C}$  reads was  
372 0.097 and 0.080 respectively, n=34.

373

### 374 Niche breadth

375

376 Pterygoplichtys sp. was the main identifiable prey item in all samples from the  
377 Usumacinta basin. Occurrence of ACF in scat samples was highest (49%) in samples  
378 collected from Pasion River 7 years after the first report of the catfish, an increase from  
379 9.9% in 2010 (Table 3). ACF occurrence also increased in the San Pedro River, but less than  
380 in the Pasion River. *O. aureus* was an important item (percentage of occurrence > 5%) for  
381 otters in the Pasion and San Pedro rivers in 2015 and the Mopan River in 2016 (Table 3).

382

383 Based on species accumulation curves, the expected number of prey species was  
384 marginally lower in 2015 than in 2010 in Pasion River samples (Fig 2A); no difference was  
385 seen for San Pedro River samples (Fig 2B). When all three rivers were compared based on  
386 data from 2015-2016, otters from the San Pedro River were expected to have more prey  
387 species, those from the Pasion River fewer species, and those from the Mopan River were  
388 expected to have a middle number of prey species. Confidence intervals around expected  
389 numbers were wide and overlapped, especially between curves from the Mopan River and  
390 the other two rivers (Fig 2C). Further, the assumption that all samples used to construct  
391 the accumulation curves were independent may have been violated because some of the  
392 scats were collected from the same latrine.

393

394 **Fig 2.** Species accumulation curves for prey species found in scats of Neotropical river otter in the **(A)** Pasion  
395 River, Guatemala 2010 (Pa10) and 2015 (Pa15); **(B)** San Pedro River, Guatemala, in 2009 (Sp09) and 2015  
396 (Sp15); and **(C)** Mopan River 2016 (Mo16), Pasion River 2015 (Pa15) and San Pedro River 2015 (Sp15).

397

398 Niche breadth (Levin's index,  $B_a$ ) of the Neotropical river otter was lower 7 years  
399 after the ACF invasion when compared to 2 years after the invasion in the San Pedro River  
400 ( $B_a = 0.53$  in 2009 vs 0.29 in 2015). A similar situation was found in Pasion River ( $B_a = 0.47$   
401 in 2010 vs 0.18 in 2015). NRO niche breadth varied among the three rivers in 2015, with  
402 similar values in San Pedro River and Mopan River and lower values in Pasion River ( $B_a =$   
403 0.29, 0.28 and 0.18 respectively; Table 4).

404

405 **Table 4** Neotropical river otter niche breadth (Levin's index,  $B_a$ ) in the study area.

| River     | year | Ba   | 2.5% quantile | 97.5% quantile |
|-----------|------|------|---------------|----------------|
| Mopan     | 2016 | 0.29 | 0.36          | 0.23           |
| San Pedro | 2009 | 0.53 | 0.6           | 0.5            |
| San Pedro | 2015 | 0.29 | 0.33          | 0.25           |
| Pasion    | 2010 | 0.47 | 0.59          | 0.39           |
| Pasion    | 2015 | 0.18 | 0.25          | 0.11           |

406 Quantiles estimated using 1,000 bootstrap randomizations.

407

408 Isotope values ranged from 5.89 to 16.39  $\delta^{15}\text{N}$  and -38.31 to -20.61  $\delta^{13}\text{C}$  (Fig 3) and  
 409 did not depart from a normal distribution so no transformations were needed. Variance of  
 410  $\delta^{15}\text{N}$  signatures from fecal samples differed among groups (Levene's test for  
 411 homoscedasticity;  $W = 2.54$ ,  $p = 0.042$ ; Fig 4A). Based on pairwise comparisons, variance  
 412 of  $\delta^{15}\text{N}$  signatures from the Pasion River did not differ significantly between years ( $\sigma^2 =$   
 413 2.45 in 2010 and  $\sigma^2 = 1.80$  in 2015;  $W = 0.78$ ,  $p = 0.37$ ; Fig 4A). In contrast, variance of  $\delta^{15}\text{N}$   
 414 differed significantly between years in samples from San Pedro River ( $\sigma^2 = 4.83$  in 2009  
 415 and  $\sigma^2 = 1.73$  in 2015;  $W = 6.68$ ,  $p < 0.01$ ; Fig 4A). The  $\delta^{13}\text{C}$  variances also differed among  
 416 groups ( $W = 3.23$ ,  $p < 0.01$ ; Fig 4B), with pairwise contrasts indicating that  $\delta^{13}\text{C}$  variances  
 417 increased across years for Pasion River ( $\sigma^2 = 3.65$  in 2010 and  $\sigma^2 = 6.49$  in 2015;  $W = 3.83$ ,  
 418  $p = 0.05$ ; Fig 4B) and San Pedro River ( $\sigma^2 = 2.04$  in 2009 and  $\sigma^2 = 7.09$  in 2015;  $W = 6.75$ ,  $p$   
 419  $= 0.01$ ; Fig 4B).

420

421 **Fig 3 Isotopic values of  $\delta^{15}\text{N}$  and  $\delta^{13}\text{C}$  from Neotropical river otter scats collected from the study area.**

422 Error bars are one sd. Mo15= samples from Mopan River 2015 (n=1); Pa10, Pa15 = samples from Pasion  
 423 River 2010 and 2015 (n = 36 in 2010 and 34 in 2015); Sp09, Sp15 = samples from San Pedro River 2009 and  
 424 2015 (n = 20 in 2010 and 55 in 2015).

425

426 **Fig 4 Isotopes Variance from the mean in fecal samples from Neotropical river otters for (A)  $\delta^{15}\text{N}$  and (B)**

427  **$\delta^{13}\text{C}$ .** The mean is set to 0 to help visualize the magnitude of the variances. Pasion River n = 36 in 2010 and  
 428 34 in 2015; San Pedro River n = 20 in 2010 and 55 in 2015.

429

### 430 Trophic level

431

432 Calculations of FTL values excluded information from *Maskaheros argenteus*  
 433 (found in one sample from the Pasion River), insects, reptiles and unknown species  
 434 because no data on the FTL of those prey items were available. Similarly, crabs and  
 435 crayfish were excluded because they consume items from different trophic levels and  
 436 their specific diets are not known for the study area, although crabs were important prey  
 437 items in Mopan 2016 and Pasion 2010. The highest FTL values for NRO came from the  
 438 Mopan River in 2016, Pasion River in 2010, and San Pedro River in 2009 with lower values  
 439 from the Pasion and San Pedro rivers in 2015 (Table 5).

440

441 **Table 5 Neotropical river otter fractional trophic level (FTL) in the study area.**

| River     | year | FTL  | 2.5% quantile | 97.5% quantile |
|-----------|------|------|---------------|----------------|
| Mopan     | 2016 | 3.98 | 4.11          | 3.83           |
| San Pedro | 2009 | 3.71 | 3.79          | 3.64           |

|           |      |      |      |      |
|-----------|------|------|------|------|
| San Pedro | 2015 | 3.47 | 3.53 | 3.41 |
| Pasion    | 2010 | 3.78 | 3.9  | 3.68 |
| Pasion    | 2015 | 3.48 | 3.61 | 3.37 |

442 Quantiles estimation using 1,000 bootstrap randomizations.

443

444 Values of  $\delta^{15}\text{N}$  from NRO samples were highest in the Mopan River in 2015 (based  
445 on only one specimen), followed by mean values from the Pasion River in 2010 and the  
446 San Pedro River in 2009 (Fig 5). Lowest values came from the Pasion and San Pedro rivers  
447 in 2015 (Fig 5). Values of  $\delta^{15}\text{N}$  from sites in the Usumacinta basin differed across years  
448 (ANOVA,  $F_{1,141} = 67.98$ ;  $p < 0.001$ ) and across rivers (ANOVA,  $F_{1,141} = 15.53$ ;  $p < 0.001$ ) with  
449 no interaction between the two factors (ANOVA,  $F_{1,141} = 2.76$ ;  $p = 0.10$ ). Higher values  
450 were found from scats collected during the early sampling years in the Pasion and San  
451 Pedro rivers, two years after the first report of the ACF (post-hoc pairwise  $t$ -test with  
452 Bonferroni adjusted  $p$ -values: Pasion 2010 vs. 2015  $t = 5.37$ ,  $df = 68$ ,  $p < 0.001$ ; San Pedro  
453 2009 vs. 2015,  $t = 5.31$ ,  $df = 24.122$ ,  $p < 0.001$ ). Mean values of NRO  $\delta^{15}\text{N}$  did not differ  
454 between the Pasion and San Pedro rivers from same sampling years (Pasion vs. San Pedro  
455 2010-2009  $t = -0.40$ ,  $df = 54$ ,  $p = 1.0$ ; Pasion vs. San Pedro 2015,  $t = 2.42$ ,  $df = 87$   $p =$   
456 0.23).

457

458 **Fig. 5. Boxplots for  $\delta^{15}\text{N}$  in fecal samples from Neotropical river otters in Guatemala.** Mo16 = samples from  
459 Mopan River 2016 ( $n = 1$ ); Pa10, Pa15 = samples from Pasion River 2010 and 2015 ( $n = 36$  in 2010 and  $n = 34$   
460 in 2015); Sp09, Sp15 = samples from San Pedro River 2009 and 2015 ( $n = 20$  in 2009 and  $n = 55$  in 2015).

461

## 462 Discussion

463 Concordance between the gross scat analysis and stable isotope analysis values  
464 strongly supports the idea that an increase in consumption of the armored catfish  
465 reduced the dietary niche breadth of the neotropical river otter and trophic level at which  
466 the otter feeds in northern Guatemala. As predicted, ACF became the main prey species  
467 for the NRO in invaded rivers and, consequently, NRO  $\delta^{15}\text{N}$  variances and mean values  
468 decreased over time in both invaded rivers (with a weaker decline in Pasion River). The  
469 same pattern was observed in the standardized niche breadth index ( $B_a$ ). Further, the  
470 wider niche breadth ( $B_a$  values) in the San Pedro River may be related to its higher  
471 environmental integrity (located adjacent to a national park) that could help sustain the  
472 richness of native NRO prey or reduce the invasiveness of the ACF. This conclusion is  
473 supported by the species accumulation curves. Invasive species are predicted to have  
474 better chances of establishment in native assemblages that are depleted or disrupted and  
475 more likely to have long-term success in systems highly altered by human activity [81].  
476 The increase in  $\delta^{13}\text{C}$  variation over time suggests that the NRO diet has included a prey  
477 that consumes different producer types or a prey that consumes producers in a different  
478 proportion, likely because of the ability of ACF to exploit a different range/proportion of  
479 plant resources than natives from the same trophic guild [82]. Furthermore, the decrease  
480 in FTL across rivers (Mopan River showing similar values to San Pedro River and higher

481 than Pasion River) combined with lower mean values of  $\delta^{15}\text{N}$  provide evidence of a  
482 reduction in the NRO trophic level associated with ACF presence.

483 The range of prey types exploited by NRO changed after the invasion of ACF, with  
484 the lowest dietary niche breadth found in Pasion River seven years after the invasion. The  
485 dietary NRO niche breadth changed from that of a mild generalist to that of a specialist  
486 ( $0.6 > B_a > 0.4$  to  $B_a < 0.4$ , Levin's standardized index) in Pasion and San Pedro rivers, even  
487 though the number of prey species consumed by NRO was highest in the San Pedro River  
488 in 2015. This result is concordant with the idea that a specialist can use a wide range of  
489 resources but still concentrate on a subset of those resources [83]. It also supports the  
490 statement that NRO prey mostly on slow-moving and territorial prey species [36]; the  
491 main prey species for NRO in this study included Loricariidae, Cichlidae, large Poeciliidae,  
492 and crabs (Table 3).

493  
494 Results based on GSA and  $\delta^{15}\text{N}$  variances were similar for both indexes, with  
495 narrower niche breadth 7 years after initiation of the ACF invasion compared to 2 years  
496 after the invasion. The narrower dietary niche breath found in the Pasion River in all  
497 situations and with both indexes in relation to the San Pedro River supports the idea that  
498 the Pasion River prey community was already depleted before the arrival of the ACF, and  
499 that the Laguna del Tigre National Park provided some type of protection to the San Pedro  
500 River. A similar result was seen in a Bahamas mangrove system for grey snapper (*Lutjanus*  
501 *griseus*) with a reduced niche breadth (based on SIA) found in disturbed areas [5].  
502 Therefore, it is possible that the higher values of NRO niche breadth in San Pedro River in  
503 relation to Pasion River are related to differences in the resilience of the two rivers due to  
504 differences in habitat conservation. Disturbances may facilitate the ACF or depress  
505 populations of native fish. For example, in the Guadalquivir marshes of southwestern  
506 Spain, the Eurasian otter (*Lutra lutra*) included high levels of an invasive species (75%;  
507 North American red swamp crayfish, *Procambarus clarkii*) in its diet within 10 years of the  
508 invasion. In the same area, various waterbirds similarly consumed this invasive species at  
509 higher rates in disturbed locations than in natural marshes [1].

510  
511 In contrast to results from  $\delta^{15}\text{N}$ , variances of  $\delta^{13}\text{C}$  in fecal samples were greater  
512 seven years after the ACF invasion compared to two years after the first sighting. Values of  
513  $\delta^{13}\text{C}$  represent the plant source of a food chain and a wider variance may indicate that  
514 primary consumers exploit a greater range of producers. Loricariidae may exploit a diverse  
515 variety of basal sources or a portion that the natives does not exploit, which may help  
516 explain the increase in the variance of  $\delta^{13}\text{C}$  in NRO scats, given the increased presence of  
517 ACF in the NRO diet [84].

518  
519 Native predators may act to reduce invasive species numbers [85,86], and such  
520 predation could be one of the main biological drivers by which streams resist the invasion  
521 of exotic species [87]. Further, predators from different taxa often adapt to and benefit  
522 from the consumption of invasive species [3,4,88]. In this context, NRO may act as a buffer  
523 to hold ACF populations at low levels and minimize their potential negative effects on the  
524 system. The question that arises from this situation, as in other systems where an invasive

525 species becomes the main prey of a native predator [1], is whether the consumption of  
526 ACF by NRO and other native predators can facilitate the predators [89]. Greater predator  
527 populations might increase depredation on native prey that are threatened by  
528 overexploitation or habitat loss [90]. This effect is a valid concern in our study area, where  
529 cichlids, a group of fish that is highly appreciated by the local artisanal fisheries [91] were  
530 exploited as a group without much change when the consumption of ACF increased (Table  
531 3). Also, concern for the increase of negative interactions between native predator and  
532 humans becomes relevant when wild predators establish dense populations in or near  
533 human-dominated areas [92,93].

534

535 Both GSA and  $\delta^{15}\text{N}$  values indicated a reduction in the trophic level at which otters  
536 feed in rivers where ACF are present in northern Guatemala. Based on GSA, there were  
537 reductions in the FTL of NRO of approximately 0.33 FTL in the Pasion River and 0.2 FTL in  
538 the San Pedro River. These reductions may not represent much ecological difference. GSA  
539 may, however, under-estimate the consumption of some species and over-estimate the  
540 consumption of others either because of differences in digestibility of prey or because we  
541 measured presence of prey remains rather than consumed biomass, regardless of the  
542 amount of remains (not all remains were identifiable; e.g., spines). In contrast to GSA, SIA  
543 may give a more accurate result. Differences in mean  $\delta^{15}\text{N}$  were as great as 1.88‰ for  
544 Pasion River and 2.78‰ for San Pedro River. If we use the widely accepted 3.4‰  
545 enrichment ( $\Delta^{15}\text{N}$ ) per FTL, these differences in mean  $\delta^{15}\text{N}$  may represent changes of 0.5  
546 to 0.8 FTLs in the Pasion and San Pedro rivers, respectively. The 3.4‰  $\Delta^{15}\text{N}$  value has,  
547 however, been criticized. Models and empirical data have shown that this enrichment  
548 factor can underestimate FTL of marine predators [94]. In any case, the observed mean  
549  $\delta^{15}\text{N}$  values for NRO in both the Pasion and San Pedro rivers apparently represents a  
550 decrease in trophic level.

551

552 A reduction in the trophic level at which otters feed can have diverse effects on the  
553 riverine ecosystem. These effects may be difficult to anticipate and can compete with or  
554 interact with each other. It could mean predator release for other prey species that would  
555 benefit from reduced predation pressure [95,96]. On the other hand, consumption of the  
556 invasive species may benefit the predator, eventually leading to higher predator densities  
557 that could increase pressure on other native species. A model evaluating this situation  
558 suggests that predation on native prey by a native predator whose numbers have been  
559 enhanced by consumption of an invasive species can be more harmful than direct  
560 competition between native and invasive species [97]. Empirical data using SIA for golden  
561 eagles (*Aquila chrysaetos*) suggests that these eagles colonized the California Channel  
562 Islands after the introduction of feral pigs (*Sus scrofa*) [90]. Nonetheless, eagles still  
563 preyed on endemic meso-carnivores, including a fox (*Urocyon littoralis*) and skunk  
564 (*Spilogale gracilis amphiala*), pushing the fox towards extinction [90].

565

566 Another potential effect that needs to be evaluated is the reduction of trophic  
567 levels in the system by moving energy directly from primary consumers to top predators.  
568 This results can occur by eliminating food-web links in the mid-trophic levels through



569 competition or predation facilitated by a numerical response of predators in  
570 response to the high abundance of the invasive [1]. A similar situation was found in  
571 the United Kingdom, where researchers compared the fish assemblage in a pond  
572 with a low-trophic-level invasive cyprinid (*Pseudorasbora parva*) composing > 99%  
573 of fish present to that in another pond without the cyprinid. They reported a  
574 reduction in the  $\delta^{15}\text{N}$  values of piscivorous fish and a mean reduction in the  $\delta^{15}\text{N}$  of  
575 the complete fish community [98]. Further studies are needed to investigate the  
576 effect of different types of land management, as well as factors that indicate the  
577 ecological integrity of communities, on the ability of communities to resist or  
578 facilitate the invasion of exotic species and their interactions with native predators.  
579

## 580 Acknowledgments

581 We wish to acknowledge the institutions and all the people who helped us through those  
582 institutions to make the fieldwork and laboratory work possible: Eli.S.A., WCS-Guatemala,  
583 BALAM, CONAP-Peten, Propeten, Defensores de la Naturaleza Peten, FUNDAECO, CECON,  
584 the Univeridad de San Carlos de Guatemala Escuela de Biología, the University of Florida  
585 Departement of Geological Sciences Light Stable Isotopes Mass Spectrometry laboratory,  
586 Roan Balas, Byron Castellanos, Yobany Tut, Julio Madrid, Rony Garcia, Rafael Cevallos,  
587 Mercedes Barrios, Rosalito Barrios, Manuel Lepe, Werner Paz, Silja Ramirez, Leonel Zisse,  
588 Marta Pujol and Jason Curtis. The people who helped in the data gathering: Alejandro  
589 Chen, Alejandro Mérida, Alfredo Choc, Belarmino García, Carlos Cifuentes, Dastin Ramírez,  
590 Elder Godoy, Elmer Monzón, Ervin Flores, Fredy Tot, Jeovany Nolberto Tut Pacheco, René  
591 de Jesús Mauricio Te, Ricardo Coc Caal, Samuel Yatz, Juan Rodas but specially to Andrea  
592 Paiz and Francisco Cordova who were present during most of the sampling occasions in  
593 2015-2016 and Yasmín Quintana in 2010. Also, to the people whose comments, reviews,  
594 and advice helped to improve this document: Christina Romagosa, Bill Pine, Harry Jones,  
595 Laura Gelin, Jose Soto, Claudio Moraga, Audrey Wilson, Yasmín Quintana, Flavia Montalvo,  
596 Farah Carrasco, and Jason Curtis.

## 597 References

- 598
- 599 1. Tablado Z, Tella JL, Sánchez-Zapata JA, Hiraldo F. The paradox of the long-term  
600 positive effects of a North American crayfish on a European community of  
601 predators. *Conserv Biol.* 2010;24: 1230–1238. doi:10.1111/j.1523-  
602 1739.2010.01483.x
  - 603 2. Cattau CE, Fletcher Jr RJ, Kimball RT, Miller CW, Kitchens WM. Rapid morphological  
604 change of a top predator with the invasion of a novel prey. *Nat Ecol Evol.* Springer  
605 US; 2017; 1–8. doi:10.1038/s41559-017-0378-1
  - 606 3. Cattau CE, Fletcher Jr. RJ, Reichert BE, Kitchens WM. Counteracting effects of a non-  
607 native prey on the demography of a native predator culminate in positive  
608 population growth. *Ecol Appl.* 2016;26: 1952–1968. doi:10.1890/15-1020.1
  - 609 4. King RB, Ray JM, Stanford KM. Gorging on gobies: Beneficial effects of alien prey on

- 610 a threatened vertebrate. *Can J Zool.* 2006;84: 108–115. doi:10.1139/z05-182
- 611 5. Layman CA, Quattrochi JP, Peyer CM, Allgeier JE. Niche width collapse in a resilient  
612 top predator following ecosystem fragmentation. *Ecol Lett.* 2007;10: 937–944.  
613 doi:10.1111/j.1461-0248.2007.01087.x
- 614 6. Fricke R, Eschmeyer WN, Van Der Laan R. Catalog of Fishes. In: 04-September-2018  
615 [Internet]. 2018 [cited 6 Sep 2018]. doi:10.11646/zootaxa.3882.1.1
- 616 7. Nico LG, Jelks HL, Tuten T. Non-native suckermouth armored catfishes in Florida:  
617 Description of nest burrows and burrow colonies with assessment of shoreline  
618 conditions. *Aquat Nuis Species Res Bull.* 2009;9: 1–30.
- 619 8. Capps K a., Nico LG, Mendoza-Carranza M, Arévalo-Frías W, Ropicki AJ, Heilpern S  
620 a., et al. Salinity tolerance of non-native suckermouth armoured catfish  
621 (*Loricariidae: Pterygoplichthys*) in south-eastern Mexico: Implications for invasion  
622 and dispersal. *Aquat Conserv Mar Freshw Ecosyst.* 2011;21: 528–540.  
623 doi:10.1002/aqc.1210
- 624 9. da Cruz AL, da Silva HR, Lundstedt LM, Schwantes AR, Moraes G, Klein W, et al. Air-  
625 breathing behavior and physiological responses to hypoxia and air exposure in the  
626 air-breathing loricariid fish, *Pterygoplichthys anisitsi*. *Fish Physiol Biochem.* 2013;39:  
627 243–256. doi:10.1007/s10695-012-9695-0
- 628 10. Stevens PW, Blewett DA, Casey JP. Short-term effects of a low dissolved oxygen  
629 event on estuarine fish assemblages following the passage of hurricane Charley.  
630 *Estuaries and Coasts.* 2006;29: 997–1003. doi:10.1007/BF02798661
- 631 11. Corcuera Zabarrburú CA. Evaluación de la temperatura letal máxima para  
632 *Hypostomus hemicochiodon* y *Pterygoplichthys pardalis* en el centro de  
633 investigaciones Carlos Miguel Castañeda Ruiz. Universidad nacional Toribio  
634 Rodríguez de Mendoza de Amazonas. 2015.
- 635 12. de Oliveira C, Taboga S. R, Smarra AL, Bonilla-Rodríguez GO. Microscopical aspects  
636 of accessory air breathing through a modified stomach in the armoured catfish  
637 *Liposarcus anisitsi* (*Siluriformes, Loricariidae*). *Cytobios.* 2001;105: 153–162.
- 638 13. Froese R, Pauly D. FishBase. In: 06/2018 [Internet]. 2018 [cited 6 Sep 2018].  
639 Available: [www.fishbase.org](http://www.fishbase.org)
- 640 14. Gibbs MA, Shields JH, Lock DW, Talmadge KM, Farrell TM. Reproduction in an  
641 invasive exotic catfish *Pterygoplichthys disjunctivus* in Volusia Blue Spring, Florida,  
642 U.S.A. *J Fish Biol.* 2008;73: 1562–1572. doi:10.1111/j.1095-8649.2008.02031.x
- 643 15. Gibbs M a., Kurth BN, Bridges CD. Age and growth of the loricariid catfish  
644 *Pterygoplichthys disjunctivus* in Volusia Blue Spring, Florida. *Aquat Invasions.*  
645 2013;8: 207–218. doi:10.3391/ai.2013.8.2.08
- 646 16. Marchetti MP, Moyle PB, Levine R. Alien fishes in California watersheds:  
647 Characteristics of successful and failed invaders. *Ecol Appl.* 2004;14: 587–596.  
648 doi:10.1890/02-5301
- 649 17. Orfinger AB, Goodding DD. The global invasion of the suckermouth armored catfish  
650 genus *pterygoplichthys* (*Siluriformes: Loricariidae*): Annotated list of species,  
651 distributional summary, and assessment of impacts. *Zool Stud.* 2018;57: 1–16.  
652 doi:10.6620/ZS.2018.57-07
- 653 18. Wakida-Kusunoki AT, Ruiz-Carus R, Amador-del-Angel E. Amazon sailfin catfish,

- 654 Pterygoplichthys pardalis (Castelnau, 1855) (Loricariidae), another exotic species  
655 established in Southeastern México. Southwest Nat. 2007;52: 141–144.  
656 doi:10.1894/0038-4909(2007)52[141:ASCPPC]2.0.CO;2
- 657 19. Wakida-Kusunoki AT, Amador-Del-Angel LE. Nuevos registros de los pecos  
658 Pterygoplichthys pardalis (Castelnau 1855) y P. disjunctivus (Weber 1991)  
659 (Siluriformes: Loricariidae) en el Sureste de México. Hidrobiologica. 2008;18: 251–  
660 255.
- 661 20. Hubbs C, Edwards RJ, Garrett GP. An annotated checklist of the freshwater fishes of  
662 Texas, with keys to identification of species. Second Edi. Austin: Texas Academy of  
663 Science; 2008.
- 664 21. Wu L-W, Liu C, Lin S-M. Identification of exotic sailfin catfish species  
665 (Pterygoplichthys, Loricariidae) in Taiwan based on morphology and mtDNA  
666 sequences. Zool Stud. 2011;50: 235–246.
- 667 22. Capps KA, Flecker AS. Invasive fishes generate biogeochemical hotspots in a  
668 nutrient-limited system. PLoS One. 2013;8: e54093.  
669 doi:10.1371/journal.pone.0054093
- 670 23. Capps KA, Flecker AS. High impact of low-trophic-position invaders: Nonnative  
671 grazers alter the quality and quantity of basal food resources. Freshw Sci. 2015;34:  
672 784–796. doi:10.1086/681527.
- 673 24. Bunkley-Williams L, Williams Jr. EH, Lilystrom CG, Corujo-Flores I, Zerbi AJ, Aliaume  
674 C, et al. The South American sailfin armored catfish, *Liposarcus multiradiatus*  
675 (Hancock), a new exotic established in Puerto Rican fresh waters. Caribb J Sci.  
676 1994;30: 90–94.
- 677 25. Chaichana R, Pouangcharean S, Yoonphand R. Foraging effects of the invasive alien  
678 fish Pterygoplichthys on eggs and first-feeding fry of the native *Clarias*  
679 *macrocephalus* in Thailand. Kasetsart J. 2013;47: 581–588.
- 680 26. Hubilla M, Kis F, Primavera J. Janitor fish Pterygoplichthys disjunctivus in the Agusan  
681 Marsh: A threat to freshwater biodiversity. J Environ Sci Manag. 2007;10: 10–23.
- 682 27. Capps KA, Ulseth A, Flecker AS. Quantifying the top-down and bottom-up effects of  
683 a non-native grazer in freshwaters. Biol Invasions. 2014;17: 1253–1266.  
684 doi:10.1007/s10530-014-0793-z
- 685 28. Nico LG, Loftus WF, Reid JP. Interactions between non-native armored suckermouth  
686 catfish (Loricariidae: Pterygoplichthys) and native Florida manatee (*Trichechus*  
687 *manatus latirostris*) in artesian springs. Aquat Invasions. 2009;4: 511–519.  
688 doi:10.3391/ai.2009.4.3.13
- 689 29. Nico LG. Nocturnal and diurnal activity of armored suckermouth catfish  
690 (Loricariidae: Pterygoplichthys) associated with wintering Florida manatees  
691 (*Trichechus manatus latirostris*). Neotrop Ichthyol. 2010;8: 893–898.  
692 doi:10.1590/S1679-62252010005000014
- 693 30. Gibbs M, Futral T, Mallinger M, Martin D, Ross M. Disturbance of the Florida  
694 manatee by an invasive catfish. Southeast Nat. 2010;9: 635–648.  
695 doi:10.1656/058.009.0401
- 696 31. Lienart G-DH, Rodiles-Hernández R, Capps KA. Nesting Burrows and Behavior of  
697 Nonnative Catfishes (Siluriformes: Loricariidae) in the Usumacinta-Grijalva

- 698 Watershed, Mexico. Southwest Nat. 2013;58: 238–243. doi:10.1894/0038-4909-  
699 58.2.238
- 700 32. Toro-Ramírez A, Wakida-Kusunoki AT, Amador-del Ángel LE, Cruz-Sánchez JL.  
701 Common snook [*Centropomus undecimalis* (Bloch, 1792)] preys on the invasive  
702 Amazon sailfin catfish [*Pterygoplichthys pardalis* (Castelnau, 1855)] in the Palizada  
703 River, Campeche, southeastern Mexico. J Appl Ichthyol. 2014;30: 532–534.  
704 doi:10.1111/jai.12391
- 705 33. Ríos-Muñoz CA. Depredación de pez diablo (Loricariidae: *Pterygoplichthys*) por el  
706 cormorán oliváceo (*Phalacrocorax brasilianus*) en Villahermosa, Tabasco, México.  
707 Huitzil. 2015;16: 62–65.
- 708 34. Kruuk H, Balharry E, Taylor PT. Oxygen consumption of the Eurasian Otter *Lutra*  
709 *lutra* in relation to water temperature. Physiol Zool. 1994;67: 1174–1185.
- 710 35. Pfeiffer P, Culik BM. Energy metabolism of underwater swimming in river-otters  
711 (*Lutra lutra* L.). J Comp Physiol - B Biochem Syst Environ Physiol. 1998;168: 143–  
712 148. doi:10.1007/s003600050130
- 713 36. Rheingantz ML, Oliveira-santos LG, Waldemarin HF, Caramaschi EP. Are otters  
714 generalists or do they prefer larger, slower prey? Feeding flexibility of the  
715 neotropical otter *Lontra longicaudis* in the Atlantic forest. IUCN Otter Spec Gr Bull.  
716 2012;29: 80–94.
- 717 37. Chemes SB, Giraudo AR, Gil G. Dieta de *Lontra Longicaudis* (Carnivora, Mustelidae)  
718 en el Parque Nacional El Rey (Salta, Argentina) y su comparación con otras  
719 poblaciones de la cuenca. Mastozoología Neotrop. 2010;17: 19–29.  
720 doi:10.2307/3504393
- 721 38. Kasper CB, Bastazini VAG, Salvi J, Grillo HCZ. Trophic ecology and the use of shelters  
722 and latrines by the Neotropical otter (*Lontra longicaudis*) in the Taquari Valley,  
723 Southern Brazil. Iheringia Série Zool. 2008;98: 469–474.
- 724 39. Mayor-Victoria R, Botero-Botero Á. Dieta de la nutria neotropical *Lontra longicaudis*  
725 (Carnívora, mustelidae) en el Río Roble, Alto Cauca, Colombia. Acta Biológica  
726 Colomb. 2010;15: 237–244.
- 727 40. Silva FA Da, Nascimento EDM, Quintela FM. Diet of *Lontra longicaudis* (Carnivora:  
728 Mustelidae) in a pool system in Atlantic forest of Minas Gerais State, southeastern  
729 Brazil. Acta Sci Biol Sci. 2012;34: 407–412. doi:10.4025/actasciobiolsci.v34i4.10332
- 730 41. Casariego-Madorell A, List R, Ceballos G. ASPECTOS BÁSICOS SOBRE LA ECOLOGÍA  
731 DE LA NUTRIA DE RÍO (*Lontra longicaudis annectens*) PARA LA COSTA DE OAXACA.  
732 Rev Mex Mastozoología. 2006;10: 71–74.
- 733 42. Monroy-Vilchis O, Mundo V. Nicho trófico de la nutria neotropical (*Lontra*  
734 *longicaudis*) en un ambiente modificado, Temascaltepec, México. Rev Mex  
735 Biodivers. 2009;80: 801–806.
- 736 43. Rheingantz ML, Waldemarin HF, Rodrigues L, Moulton TP. Seasonal and spatial  
737 differences in feeding habits of the Neotropical otter *Lontra longicaudis* (Carnivora:  
738 Mustelidae) in a coastal catchment of southeastern Brazil. Zoologia. 2011;28: 37–  
739 44. doi:10.1590/S1984-46702011000100006
- 740 44. Marques Quintela F, Almeida Porciuncula R, Pinto Colares E. Dieta de *Lontra*  
741 *longicaudis* (Olfer) (Carnivora, Mustelidae) em um arroio costeiro da região sul do

- 742 Estado do Rio Grande do Sul, Brasil. *Neotrop Biol Conserv.* 2008;3: 119–125.  
743 doi:10.4013/nbc.20083.03
- 744 45. Sousa KS, Saraiva DD, Colares EP. Intra-annual dietary variation in the neotropical  
745 otter from southern Brazil. *Mammal Study.* 2013;38: 155–162.
- 746 46. Kasper CB, Feldens MJ, Salvi J, César H, Grillo Z. Estudo preliminar sobre a ecologia  
747 de *Lontra longicaudis* (Olfers) (Carnivora, Mustelidae) no Vale do Taquari, Sul do  
748 Brasil. *Rev Bras Zool.* 2004;21: 65–72.
- 749 47. Pardini R. Feeding ecology of the neotropical river otter *Lontra longicaudis* in an  
750 Atlantic Forest stream, south-eastern Brazil. *J Zool.* 1998;245: 385–391.  
751 doi:10.1111/j.1469-7998.1998.tb00113.x
- 752 48. Holdridge LR, Grenke WC. Forest environments in tropical life zones: a pilot study.  
753 1971.
- 754 49. Willink PW, Barrientos C, Kihn HA, Chernoff B. An ichthyological survey of Laguna  
755 del Tigre National Park, Peten, Guatemala. In: Bestelmeyer BT, Alonso LE, editors. A  
756 biological assessment of Laguna del Tigre National Park, Petén, Guatemala RAP  
757 bulleting of biological assessment 16. Washintong, DC: Conservation International;  
758 2000. pp. 41–48.
- 759 50. Granados-Dieseldorff P, Christensen MF, Kihn-Pineda PH. Fishes from Lachuá lake,  
760 upper Usumacinta basin, guatemala. *Check List.* 2012;8: 95–101.
- 761 51. Greenfield DW, Thomerson JE. Fishes of the continental waters of Belize. Fishes of  
762 the continental waters of Belize. University Press of Florida; 1997.
- 763 52. Aranda-Sánchez JM. Manual para el rastreo de mamíferos silvestres de México.  
764 Primera ed. Suárez Huesca HK, Hernández Vázquez L, Escobar Ramírez F de J,  
765 editors. México D.F.: Ciba Diseño y Arte Editorial; 2012.
- 766 53. Kasper CB, Salvi J, Zanardi Grillo HC. Estimativa do tamanho de duas espécies de  
767 ciclídeos (Osteichthyes, Perciformes) predados por *Lontra longicaudis* (Olfers)  
768 (Carnivora, Mustelidae), através de análise das escamas. *Rev Bras Zool.* 2004;21:  
769 499–503.
- 770 54. Juárez-Sánchez D. Scale guide to identify medium and large freshwater fish from  
771 northern Guatemala [Internet]. University of Florida. 2017. Available:  
772 <http://ufdc.ufl.edu/l/IR00009693/00001>
- 773 55. Juárez-Sánchez D, Estrada C, Bustamante M, Moreira J, Quintana Y, López J. Guia  
774 ilustrada de pelos para la identificación de mamíferos mayores y medianos de  
775 Guatemala. 2 da edici. Dirección General de Investigación (DIGI), editor. Guatemala;  
776 2010.
- 777 56. Colwell RK, Chang XM, Chang J. Interpolating, extrapolating, and comparing  
778 incidence-based species accumulation curves. *Ecology.* 2004;85: 2717–2727.  
779 doi:10.1890/03-0557
- 780 57. Levins R. Evolution in changing enviroment: Some theoretical explorations. Princeton  
781 university press. Princeton, New Jersey; 1968.
- 782 58. Krebs CJ. *Ecological Methodology.* Second Edi. New York: Addison-Wesley  
783 Educational Publishers, Inc.; 1999. doi:10.1037/023990
- 784 59. Novakowski GC, Hahn NS, Fugi R. Diet seasonality and food overlap of the fish  
785 assemblage in a pantanal pond. *Neotrop Ichthyol.* 2008;6: 567–576.

- 786 doi:10.1590/S1679-62252008000400004
- 787 60. Pauly D, Palomares M. Fishing down marine food web: It is far more pervasive than  
788 we thought. *Bull Mar Sci.* 2005;76: 197–211.
- 789 61. Post DM. Using stable isotopes to estimate trophic position: Models, methods, and  
790 assumptions. *Ecology.* 2002;83: 703–718. doi:Doi 10.2307/3071875
- 791 62. Vander Zanden MJ, Casselman JM, Rasmussen JB. Stable isotope evidence for the  
792 food web consequences of species invasions in lakes. *Nature.* 1999;401: 464–467.
- 793 63. Petersen BJ, Fry B. *Stable Isotopes in Ecosystem Studies.* *Annu Rev Ecol Syst.*  
794 1987;18: 293–320. doi:10.1146/annurev.es.18.110187.001453
- 795 64. Fry B. *Stable isotope ecology.* 3rd editio. United States of America.: Springer  
796 Science+Business Media, LLC; 2008. doi:10.1007/0-387-33745-8
- 797 65. Kelly JF. Stable isotopes of carbon and nitrogen in the study of avian and  
798 mammalian trophic ecology. *Can J Zool.* 2000;78: 1–27. doi:10.1139/z99-165
- 799 66. Blundell G, Ben-David M, Bowyer R. Sociality in river otters: Cooperative foraging or  
800 reproductive strategies? *Behav Ecol.* 2002;13: 134–141.  
801 doi:10.1093/beheco/13.1.134
- 802 67. Angerbjorn A, Hersteinsson P, Liden K, Nelson E. Dietary variation in arctic foxes  
803 (*Alopex lagopus*): An analysis of stable carbon isotopes. *Oecologia.* 1994;99: 226–  
804 232. doi:10.1007/BF00627734
- 805 68. Darimont CT, Reimchen TE. Intra-hair stable isotope analysis implies seasonal shift  
806 to salmon in gray wolf diet. *Can J Zool.* 2002;80: 1638–1642. doi:10.1139/z02-149
- 807 69. Aurioles-Gamboa D, Newsome SD, Salazar-Pico S, Koch PL. Stable isotope  
808 differences between sea lions (*Zalophus*) from the Gulf of California and Galapagos  
809 Islands. *J Mammal.* 2009;90: 1410–1420. doi:10.1644/08-mamm-a-209r2.1
- 810 70. Fortin JK, Schwartz CC, Gunther KA, Teisberg JE, Haroldson MA, Evans MA, et al.  
811 Dietary adjustability of grizzly bears and American black bears in Yellowstone  
812 National Park. *J Wildl Manage.* 2013;77: 270–281. doi:10.1002/jwmg.483
- 813 71. Wengeler WR, Kelt D a., Johnson ML. Ecological consequences of invasive lake trout  
814 on river otters in Yellowstone National Park. *Biol Conserv.* 2010;143: 1144–1153.  
815 doi:10.1016/j.biocon.2010.02.012
- 816 72. Schoeninger MJ, DeNiro MJ, Tauber H. Stable nitrogen isotope ratios of bone  
817 collagen reflect marine and terrestrial components of prehistoric human diet.  
818 *Science (80- ).* 1983;220: 1381–1383.
- 819 73. Newsome SD, Phillips DL, Culleton BJ, Guilderson TP, Koch PL. Dietary  
820 reconstruction of an early to middle Holocene human population from the central  
821 California coast: Insights from advanced stable isotope mixing models. *J Archaeol*  
822 *Sci.* 2004;31: 1101–1115. doi:10.1016/j.jas.2004.02.001
- 823 74. Salvarina I, Yohannes E, Siemers BM, Koselj K. Advantages of using fecal samples for  
824 stable isotope analysis in bats: Evidence from a triple isotopic experiment. *Rapid*  
825 *Commun Mass Spectrom.* 2013;27: 1945–1953. doi:10.1002/rcm.6649
- 826 75. Crowley S, Johnson CJ, Hodder DP. Spatio-temporal variation in river otter (*Lontra*  
827 *canadensis*) diet and latrine site activity. *Écoscience.* 2013;20: 28–39.  
828 doi:10.2980/20-1-3509
- 829 76. Crait JR, Ben-David M. Effects of river otter activity on terrestrial plants in

- 830 trophically altered Yellowstone Lake. *Ecology*. 2007;88: 1040–1052.  
831 doi:10.1890/06-0078
- 832 77. Codron D, Codron J, Lee-Thorp JA, Sponheimer M, de Ruiter D. Animal diets in the  
833 Waterberg based on stable isotopic composition of faeces. *South African J Wildl*  
834 *Res*. 2005;35: 43–52.
- 835 78. Hatch KA, Roeder BL, Buckman RS, Gale BH, Bunnell ST, Eggett DL, et al. Isotopic  
836 and gross fecal analysis of American black bear scats. *Ursus*. 2011;22: 133–140.  
837 doi:10.2192/URSUS-D-10-00034.1
- 838 79. Bearhop S, Adams CE, Waldron S, Fuller RA, Macleod H. Determining trophic niche  
839 width: A novel approach using stable isotope analysis. *J Anim Ecol*. 2004;73: 1007–  
840 1012. doi:10.1111/j.0021-8790.2004.00861.x
- 841 80. R Core Team. R: A Language and Environment for Statistical Computing [Internet].  
842 Vienna, Austria: R Foundation for Statistical Computing; 2018. Available:  
843 <https://www.r-project.org/>
- 844 81. Moyle PB, Light T. Biological invasions of fresh water: Empirical rules and assembly  
845 theory. *Biol Conserv*. 1996;78: 149–161. doi:10.1016/0006-3207(96)00024-9
- 846 82. Lopes CA, Manetta GI, Figueiredo BRS, Martinelli LA, Benedito E. Carbon from  
847 littoral producers is the major source of energy for bottom-feeding fish in a tropical  
848 floodplain. *Environ Biol Fishes*. 2015;98: 1081–1088. doi:10.1007/s10641-014-0343-  
849 7
- 850 83. Peers MJL, Thornton DH, Murray DL. Reconsidering the specialist-generalist  
851 paradigm in niche breadth dynamics: Resource gradient selection by Canada lynx  
852 and bobcat. *PLoS One*. 2012;7: e51488. doi:10.1371/journal.pone.0051488
- 853 84. Burress ED, Duarte A, Gangloff MM, Siefferman L. Isotopic trophic guild structure of  
854 a diverse subtropical South American fish community. *Ecol Freshw Fish*. 2013;22:  
855 66–72. doi:10.1111/eff.12002
- 856 85. Ward-Fear G, Brown GP, Shine R. Using a native predator (the meat ant,  
857 *Iridomyrmex reburrus*) to reduce the abundance of an invasive species (the cane  
858 toad, *Bufo marinus*) in tropical Australia. *J Appl Ecol*. 2010;47: 273–280.  
859 doi:10.1111/j.1365-2664.2010.01773.x
- 860 86. Wanger TC, Wielgoss AC, Motzke I, Clough Y, Brook BW, Sodhi NS, et al. Endemic  
861 predators, invasive prey and native diversity. *Proc R Soc B Biol Sci*. 2011;278: 690–  
862 694. doi:10.1098/rspb.2010.1512
- 863 87. Baltz DM, Moyle PB. Invasion resistance to introduced species by a native  
864 assemblage of California stream fishes. *Ecol Appl*. 1993;3: 246–255.
- 865 88. Skewes O, Moraga CA, Arriagada P, Rau JR. El jabalí europeo (*Sus scrofa*): Un  
866 invasor biológico como presa reciente del puma (*Puma concolor*) en el sur de Chile.  
867 *Rev Chil Hist Nat*. 2012;85: 227–232. doi:10.4067/S0716-078X2012000200009
- 868 89. Cameron EK, Bayne EM. Invasion by a non-native ecosystem engineer alters  
869 distribution of a native predator. *Divers Distrib*. 2012;18: 1190–1198.  
870 doi:10.1111/j.1472-4642.2012.00912.x
- 871 90. Roemer GW, Donlan CJ, Courchamp F. Golden eagles, feral pigs, and insular  
872 carnivores: How exotic species turn native predators into prey. *Proc Natl Acad Sci U*  
873 *S A*. 2002;99: 791–796. doi:10.1073/pnas.012422499

- 874 91. Barrientos C, Quintana Y, Elías DJ, Rodiles-Hernández R. Peces nativos y pesca  
875 artesanal en la cuenca Usumacinta, Guatemala. *Mex Rev Mex Biodivers.* 2018;89:  
876 S118–S130. doi:10.22201/ib.20078706e.2018.4.2180
- 877 92. Yirga G, Leirs H, De longh HH, Asmelash T, Gebrehiwot K, Deckers J, et al. Spotted  
878 hyena (*Crocuta crocuta*) concentrate around urban waste dumps across Tigray,  
879 northern Ethiopia. *Wildl Res.* 2015;42: 563–569. doi:10.1071/WR14228
- 880 93. Bateman PW, Fleming PA. Big city life: Carnivores in urban environments. *J Zool.*  
881 2012;287: 1–23. doi:10.1111/j.1469-7998.2011.00887.x
- 882 94. Hussey NE, Macneil MA, Mcmeans BC, Olin JA, Dudley SFJ, Cliff G, et al. Rescaling  
883 the trophic structure of marine food webs. *Ecol Lett.* 2014;17: 239–250.  
884 doi:10.1111/ele.12226
- 885 95. Rodriguez LF. Can invasive species facilitate native species? Evidence of how, when,  
886 and why these impacts occur. *Biol Invasions.* 2006;8: 927–939. doi:10.1007/s10530-  
887 005-5103-3
- 888 96. Grosholz ED, Ruiz GM, Dean C a, Shirley K a, John L, Connors PG, et al. The impacts  
889 of a nonindigenous marine predator in a California Bay. *Ecology.* 2000;81: 1206–  
890 1224.
- 891 97. Noonburg EG, Byers JE. More harm than good: When invader vulnerability to  
892 predators enhances impact on native species. *Ecology.* 2005;86: 2555–2560.  
893 doi:10.1890/05-0143
- 894 98. Britton JR, Davies GD, Harrod C. Trophic interactions and consequent impacts of the  
895 invasive fish *Pseudorasbora parva* in a native aquatic foodweb: A field investigation  
896 in the UK. *Biol Invasions.* 2010;12: 1533–1542. doi:10.1007/s10530-009-9566-5  
897



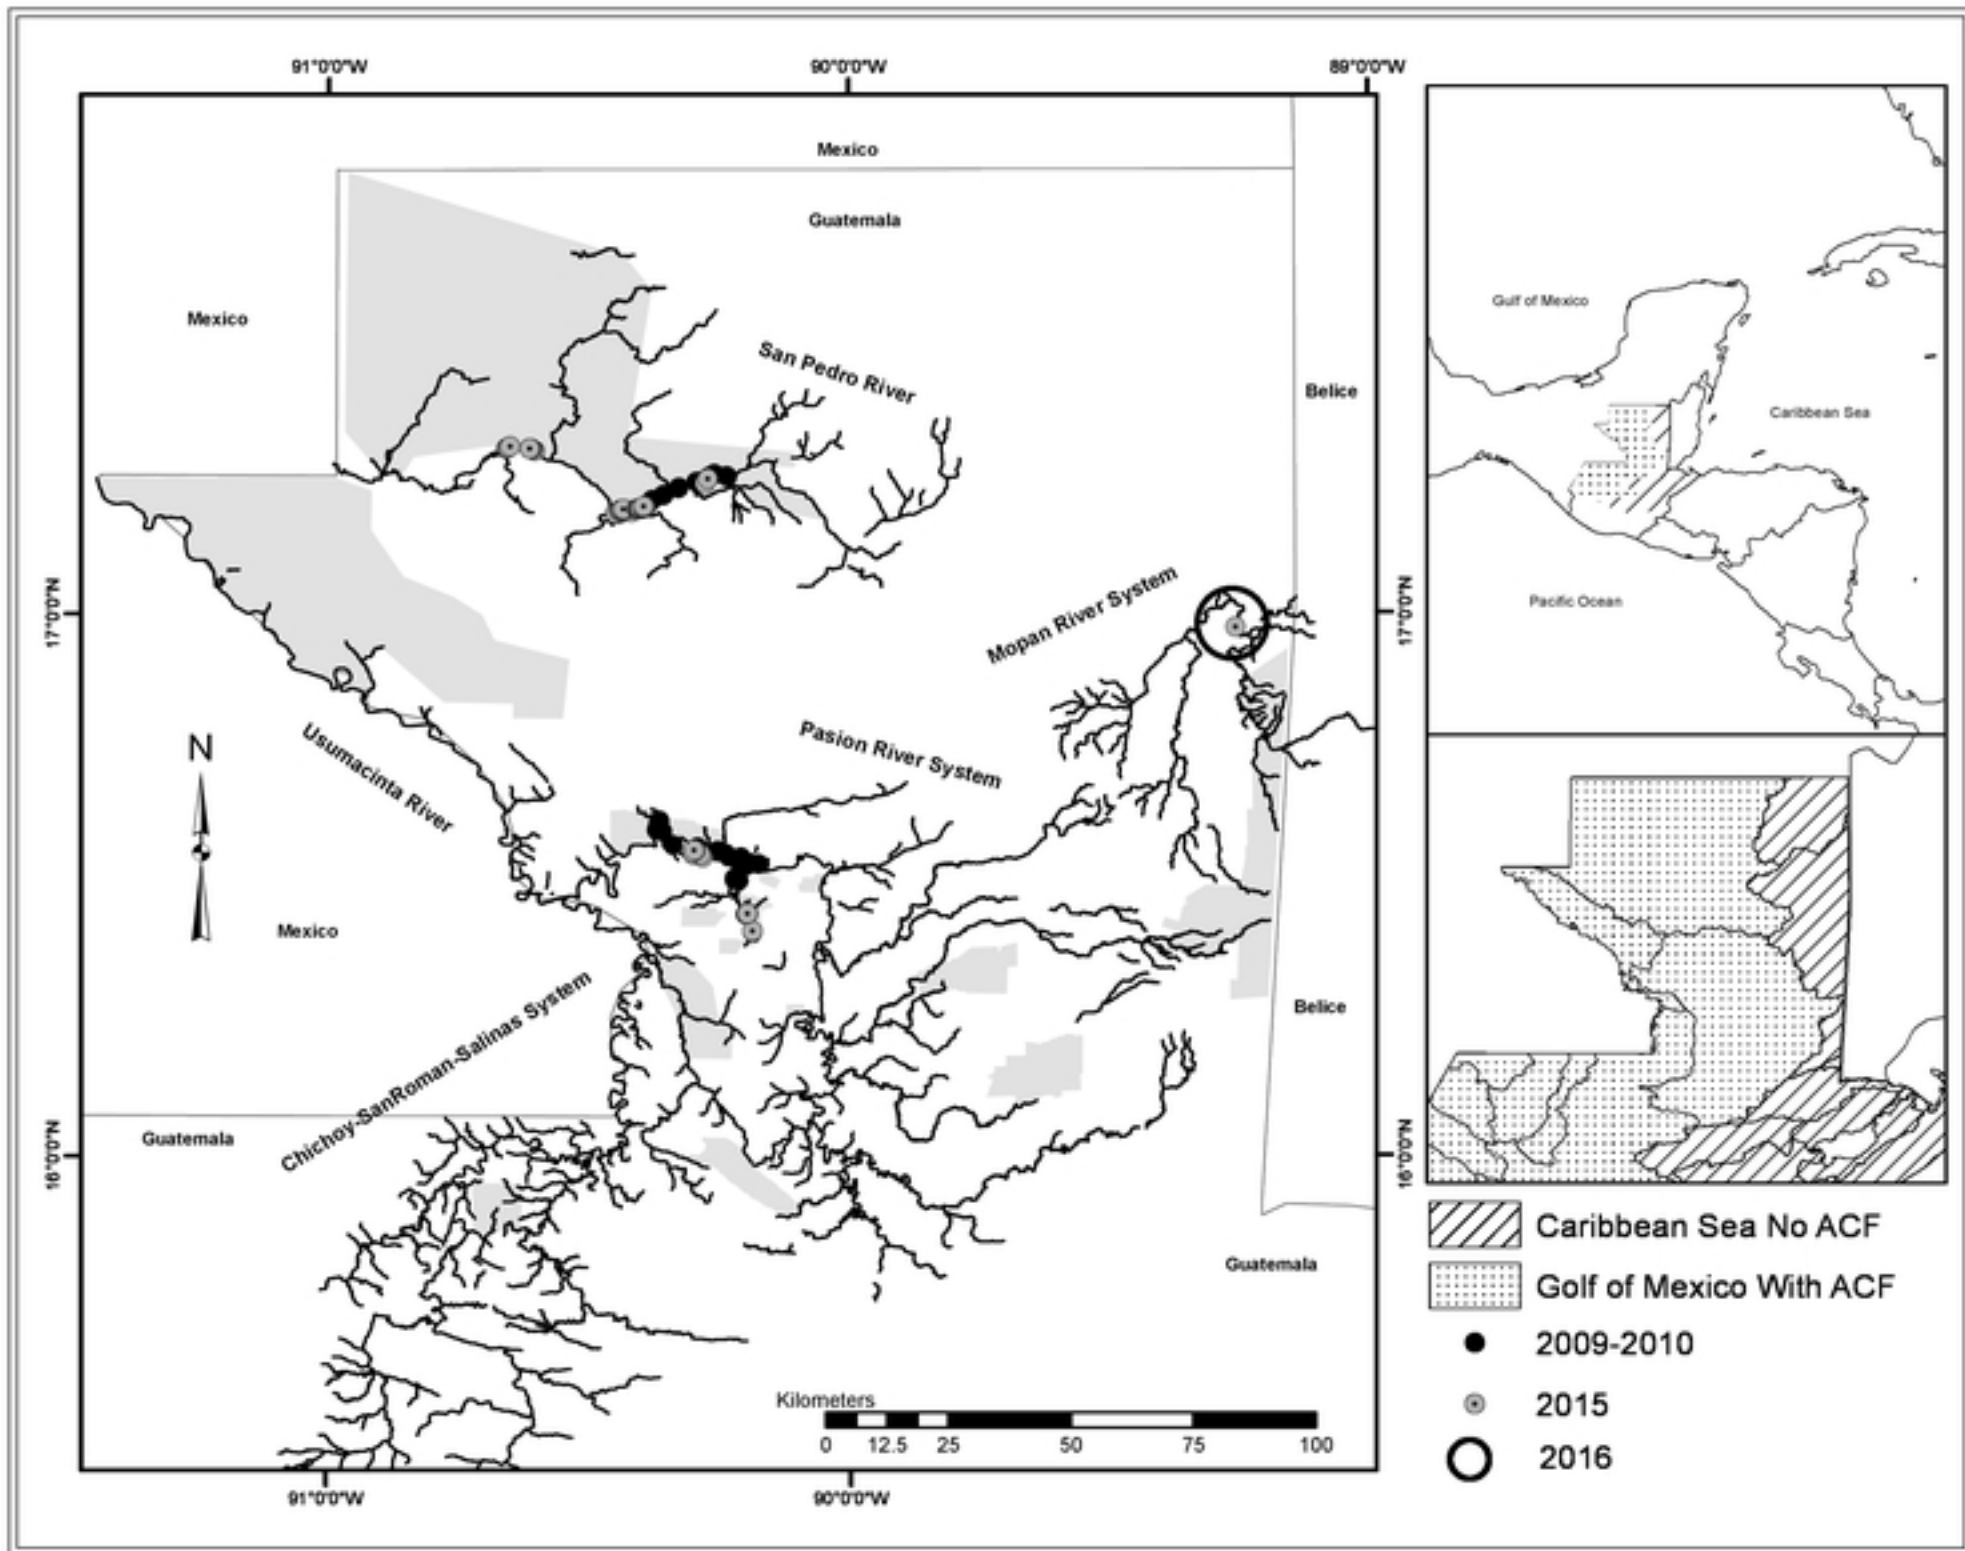

Figure

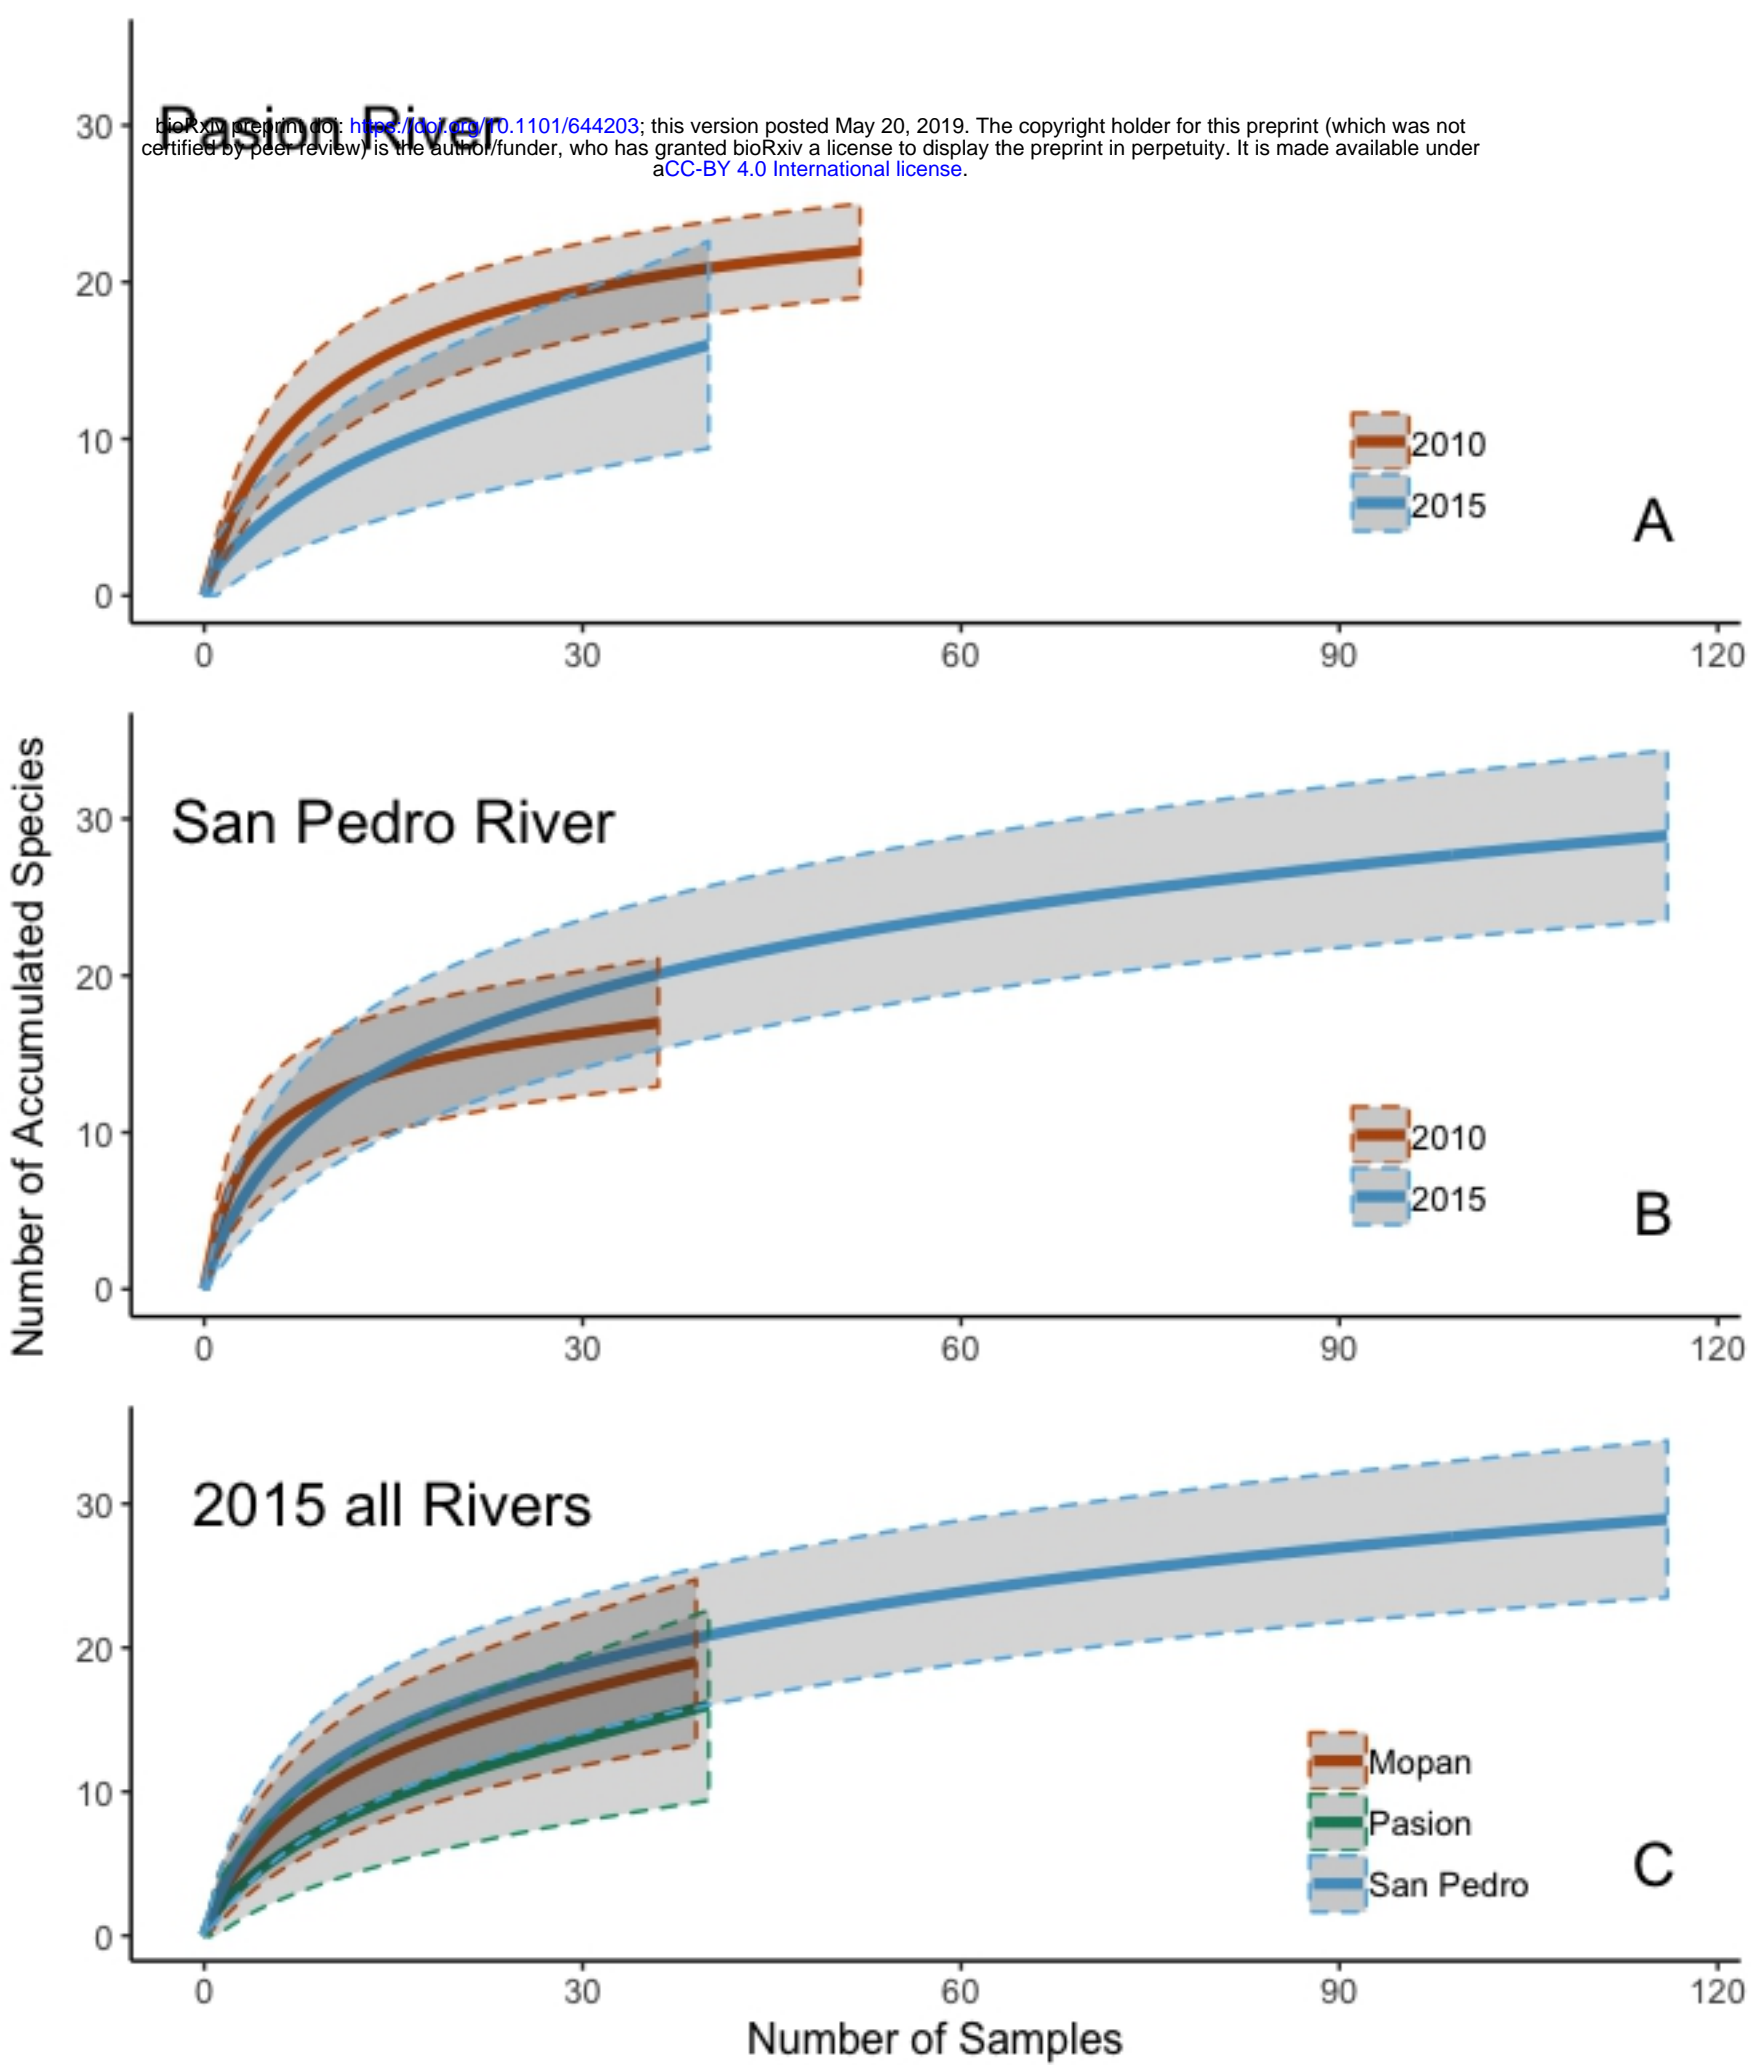

Figure

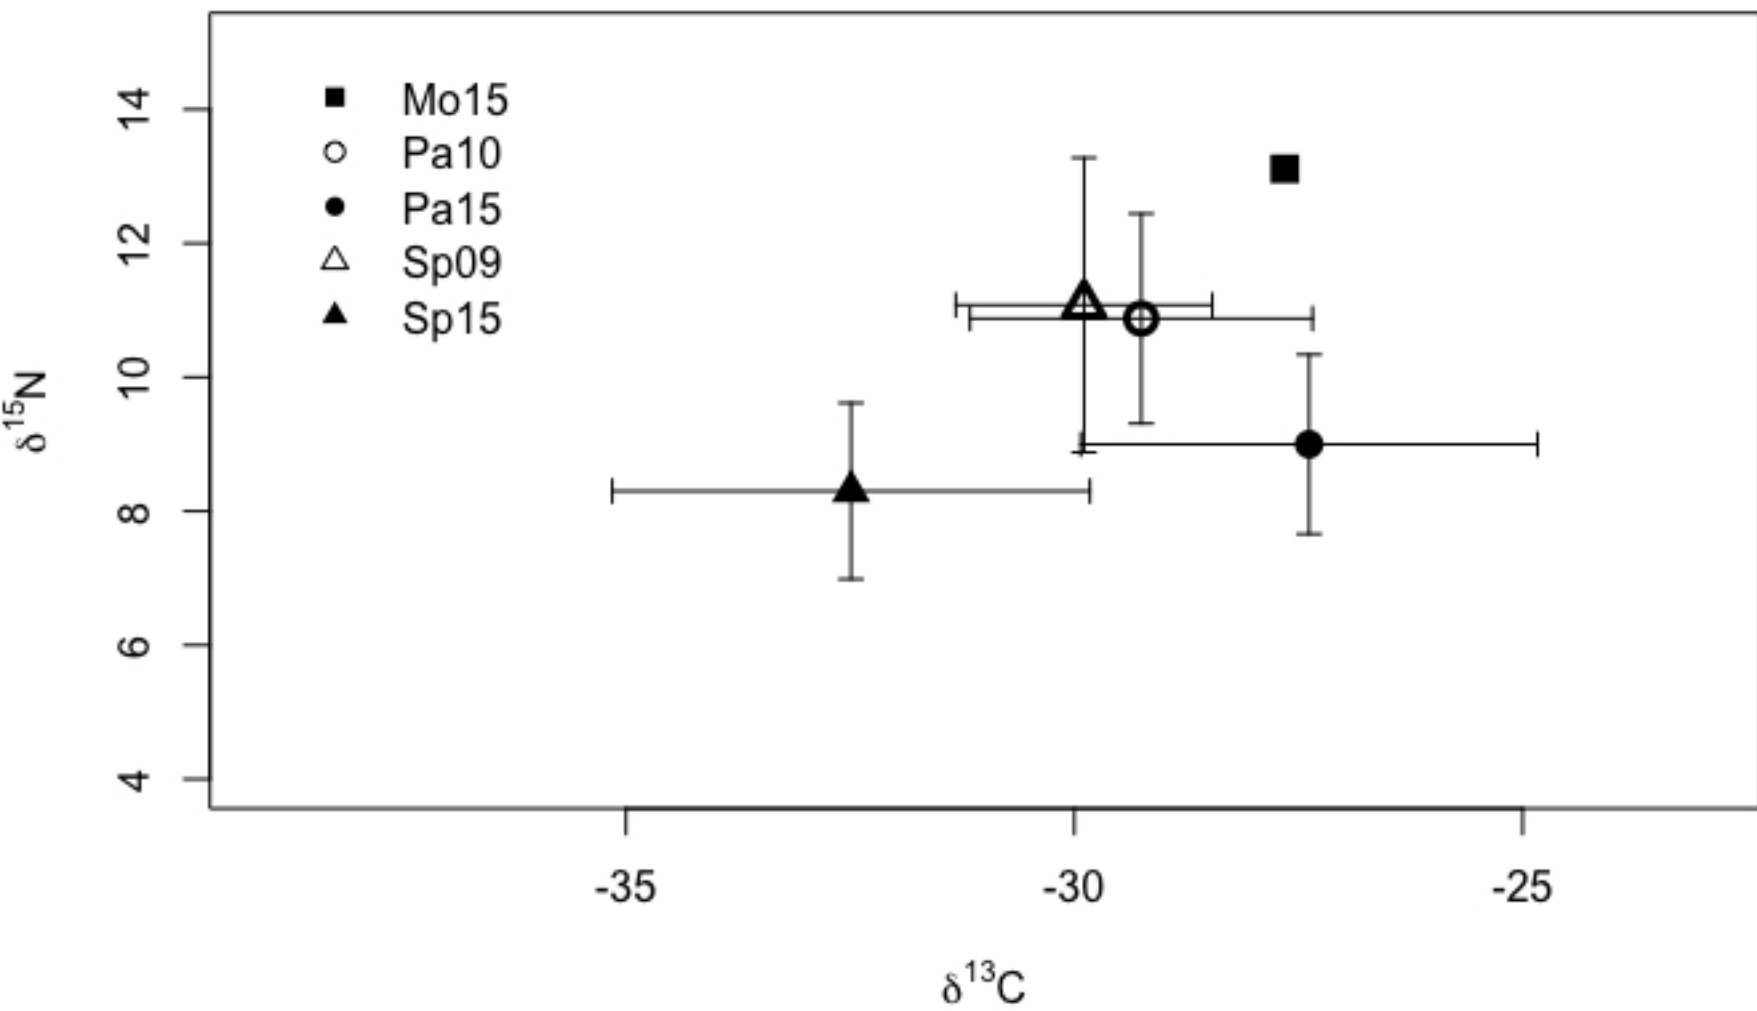

Figure

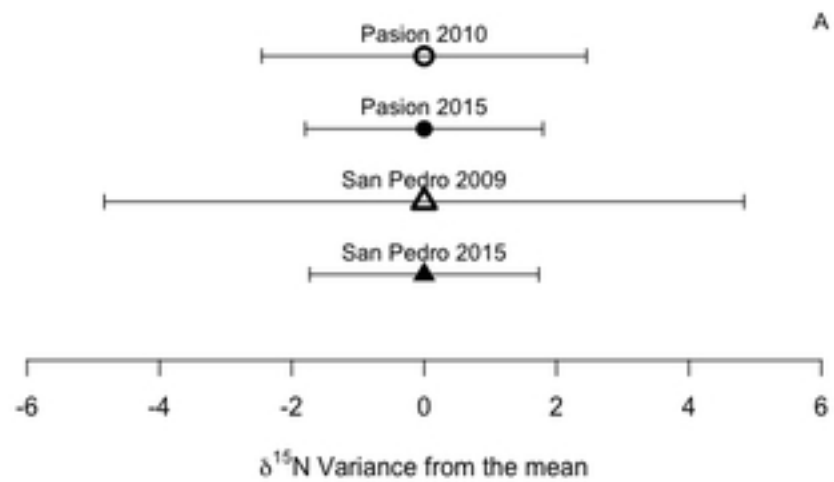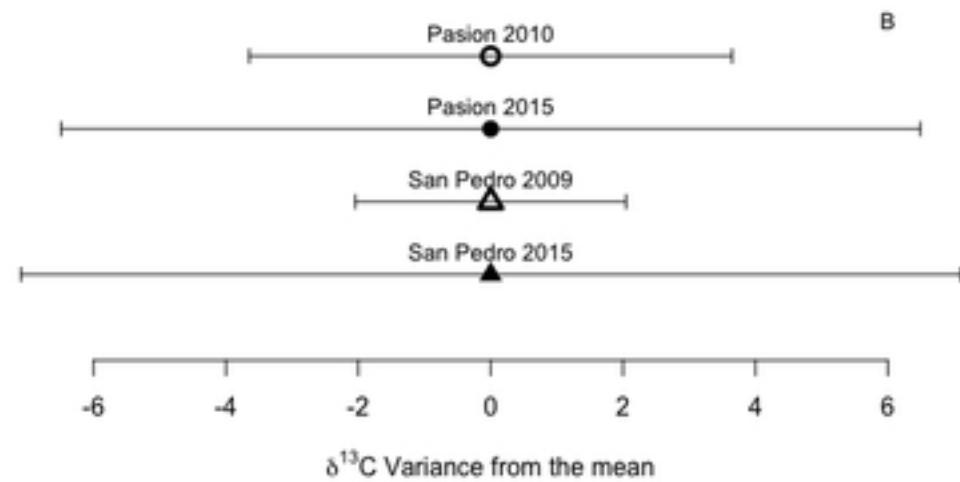

Figure

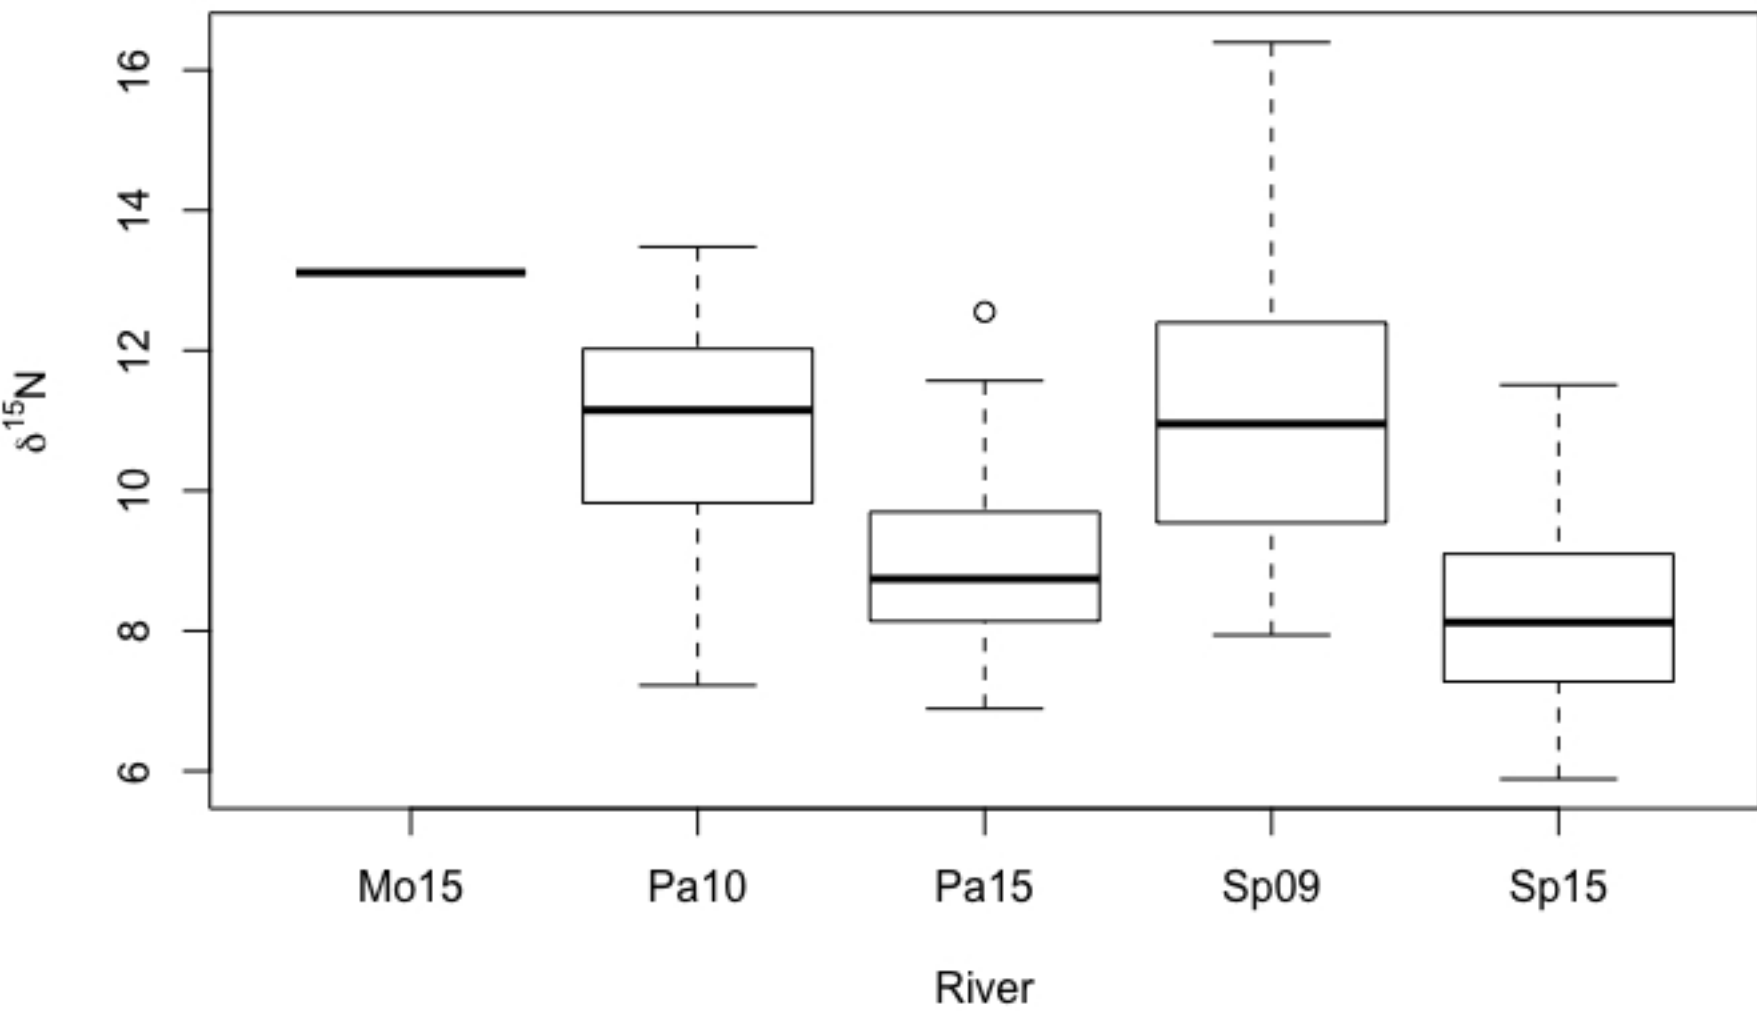

Figure
